# Supplementary material for: Lenvatinib halts aortic aneurysm growth by restoring smooth muscle cell contractility
Source: JCI journal article supplement (doi:10.1172/jci.insight.140364), 2021-06-29
Supplement: sd1 [file 1]

Suppl. Fig. 1

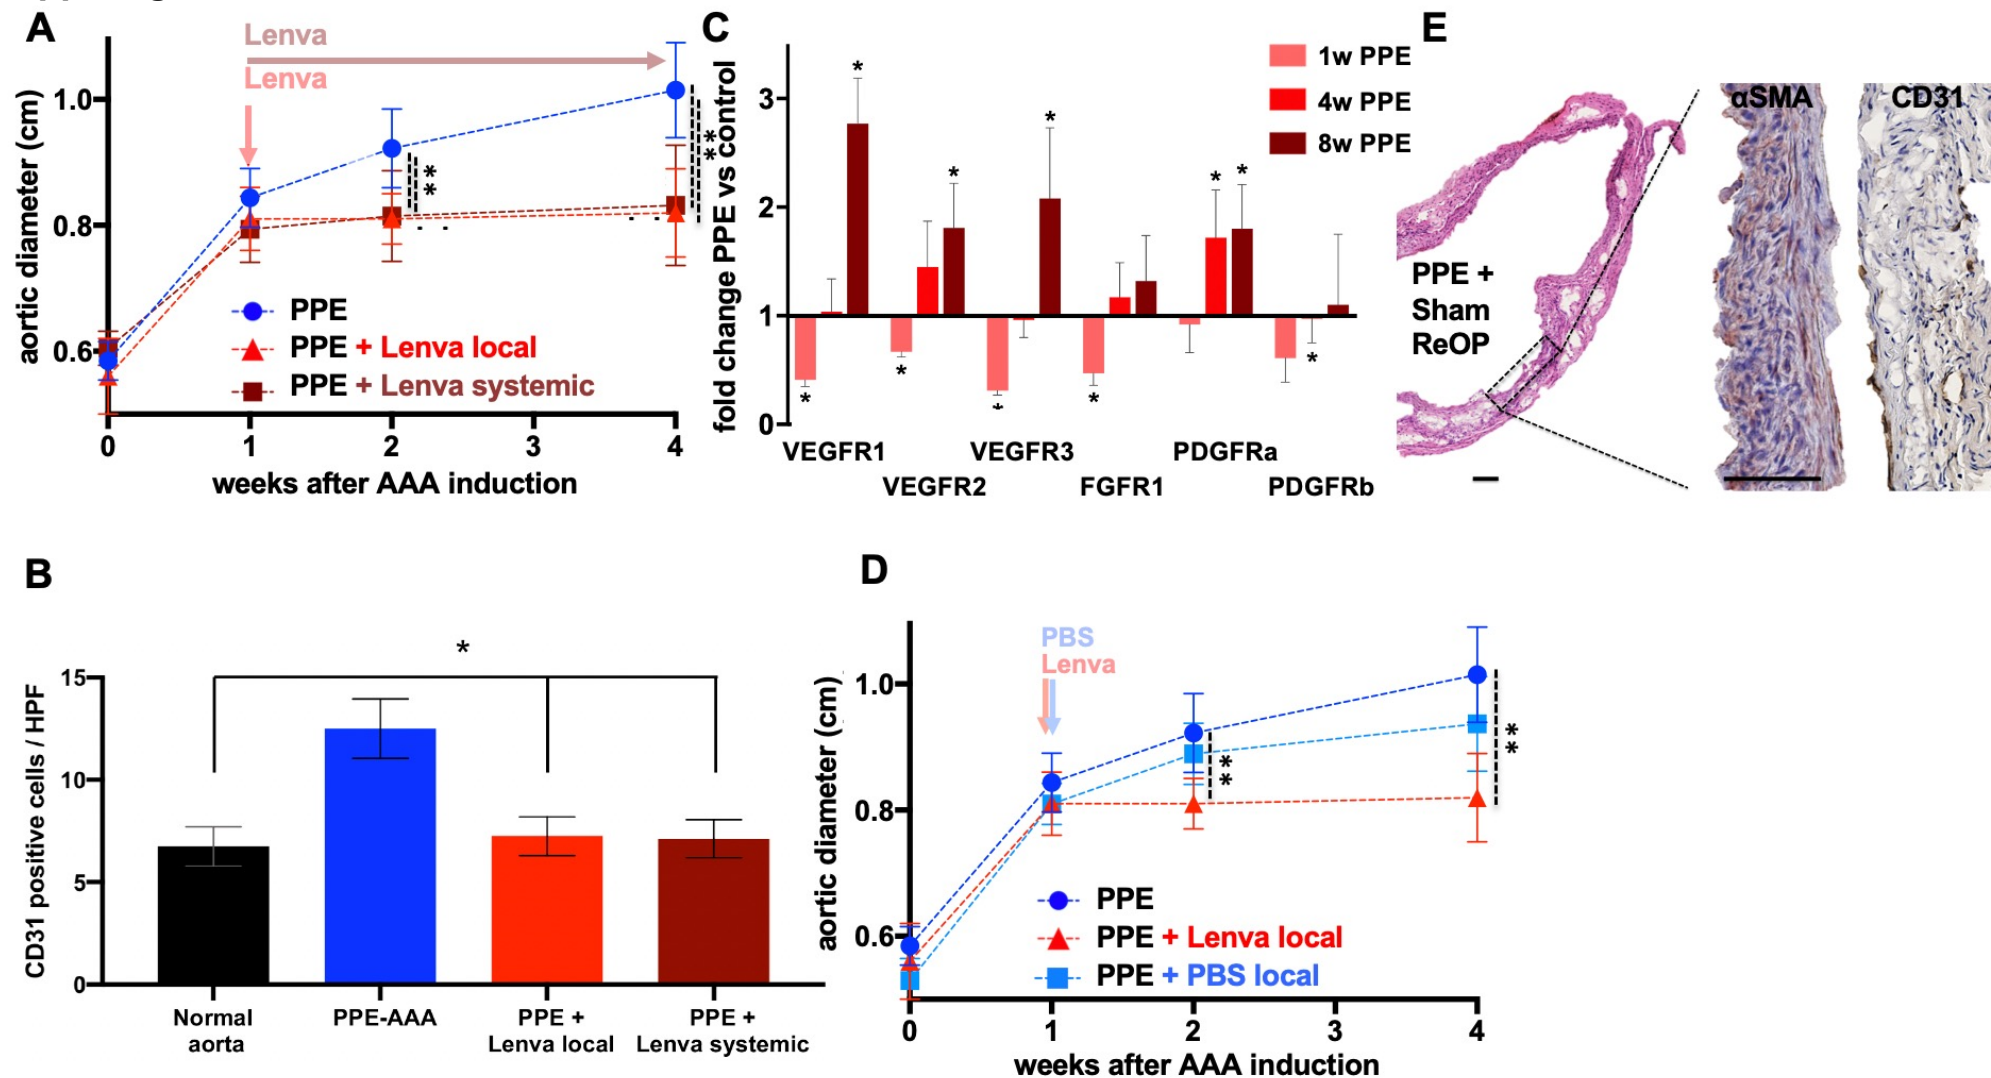

**Suppl. Figure 1: Additional murine PPE-AAA data:** (A) Absolute aortic diameters in cm for the murine PPE and lenvatinib experiments (n=11 for PPE; n=7 for Lenva systemic; n=5 for Lenva local; \*\*=p<0.01; mean + SEM; PPE AAA induction at day 0). (B) Quantification of CD31 positive cells using high power fields (HPF) analysis of representative images presented in Figures 1C-E (\*=p<0.05; mean + SEM). (C) Lenvatinib target receptors show a time-dependent up-regulation after initial suppression in PPE-AAA mice compared to non-treated control animals over a 8-week period (n=5 for controls, PPE 1 week, PPE 4 weeks and n=4 for PPE 8 weeks; \*=p<0.05; mean + SEM). (D) Absolute aortic diameters in cm for the murine PPE and local lenvatinib experiments (n=11 for PPE; n=5 for Lenva local; n=3 for PBS local; \*\*=p<0.01; mean + SEM). (E) PPE+Sham re-operation shows a disrupted media with remaining CD31 and  $\alpha$ SMA positivity, 4 weeks after initial aneurysm induction (magnification 10x/40x; scale bar 1mm).

Suppl. Fig. 2

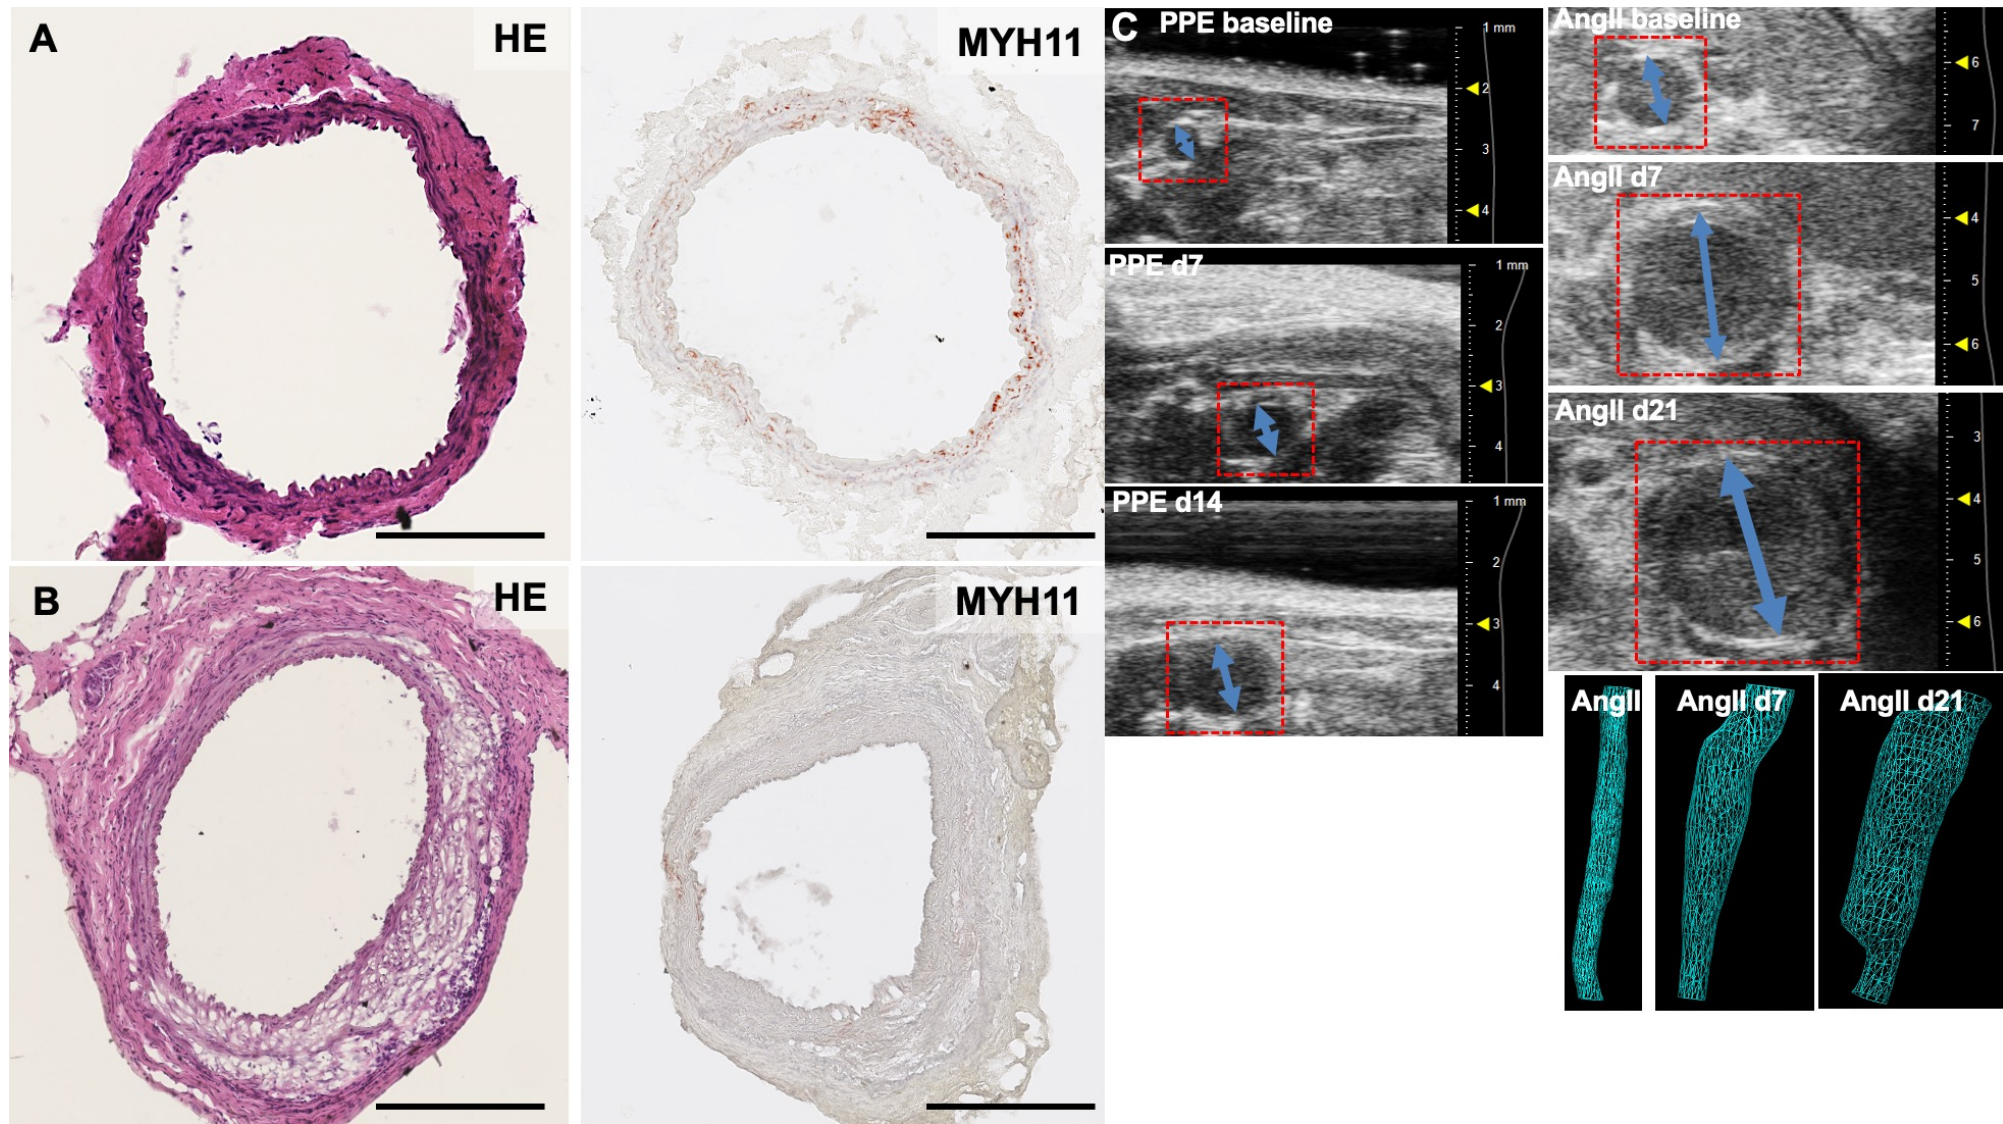

**Suppl. Figure 2: Murine MYH11 phenotype staining and murine ultrasound:** (A) Untreated control infrarenal aorta with HE staining and MYH11 immunofluorescence with red-brown target staining. (B) PPE aorta (day7 after induction) with altered tissue architecture and loss of MYH11 positivity. (scale bar 250 $\mu$ m) (C) Left panel: B mode ultrasound of the murine PPE model shows a gradual increase of the infrarenal aortic diameter from baseline to d7 and d14 (red dotted square indicates the area of interest; blue arrow indicates the aortic diameter at the maximum distance; scale bar on right side of each photograph). Right panel: ultrasound pictures from the AngII model showing diameter increase of the suprarenal aorta with visible intramural thrombus formation d21 (red dotted circle indicates the area of interest; scale bar on right side of each photograph). 3D reconstructions of the same animal at all three time points for volume calculation as presented by the Vevo 2100 Imaging System.

Suppl. Fig. 3

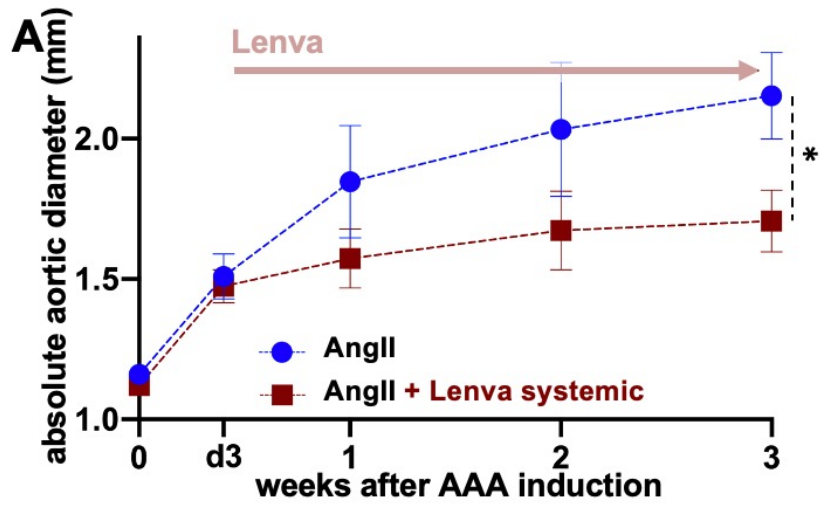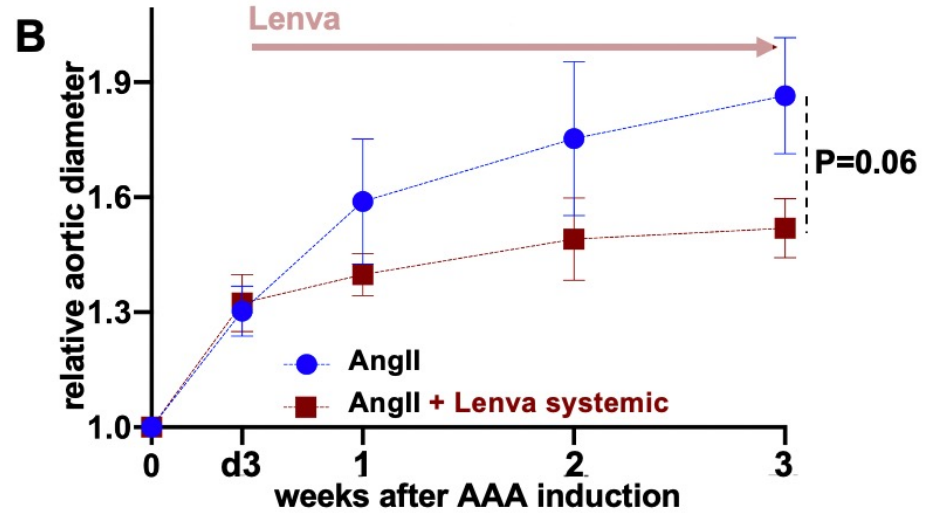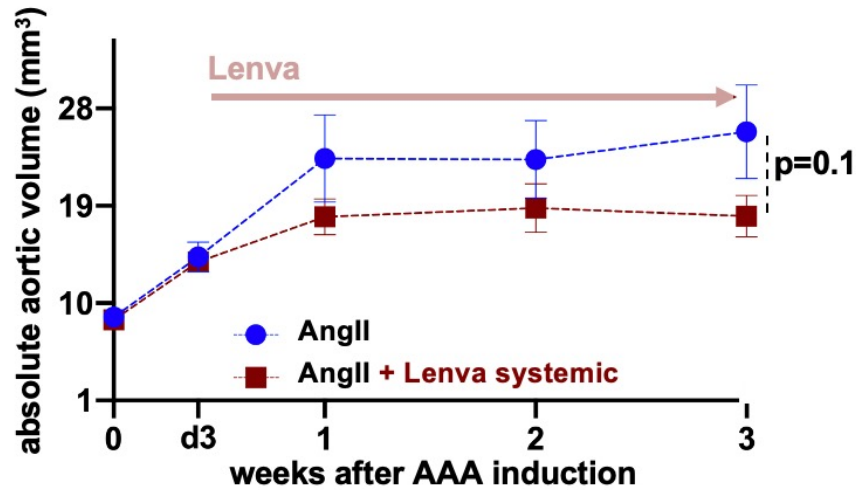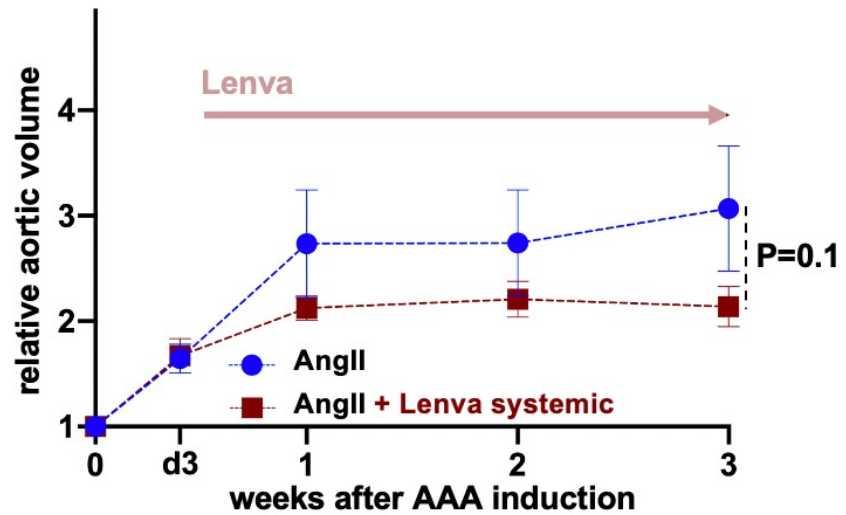

**Suppl. Figure 3: Murine AngII-AAA data:** Oral gavage of lenvatinib (dark red; n=6) continuously from day 4 (ultrasound at day 3) after AAA induction by Angiotensin II infusion. **(A)** Absolute aortic diameters and volumes in mm and mm<sup>3</sup> for the murine AngII and lenvatinib experiments (n=5 for AngII; n=6 for AngII + Lenva systemic; \*p<0.05; mean + SEM; Ang II induction started by implantation of osmotic minipump at day 0). **(B)** shows the relative aortic diameter and volume for the same experiment (relative to baseline aortic diameter/volume). (p-value calculations and detailed measurements in Suppl. Table I).

# Suppl. Fig. 4

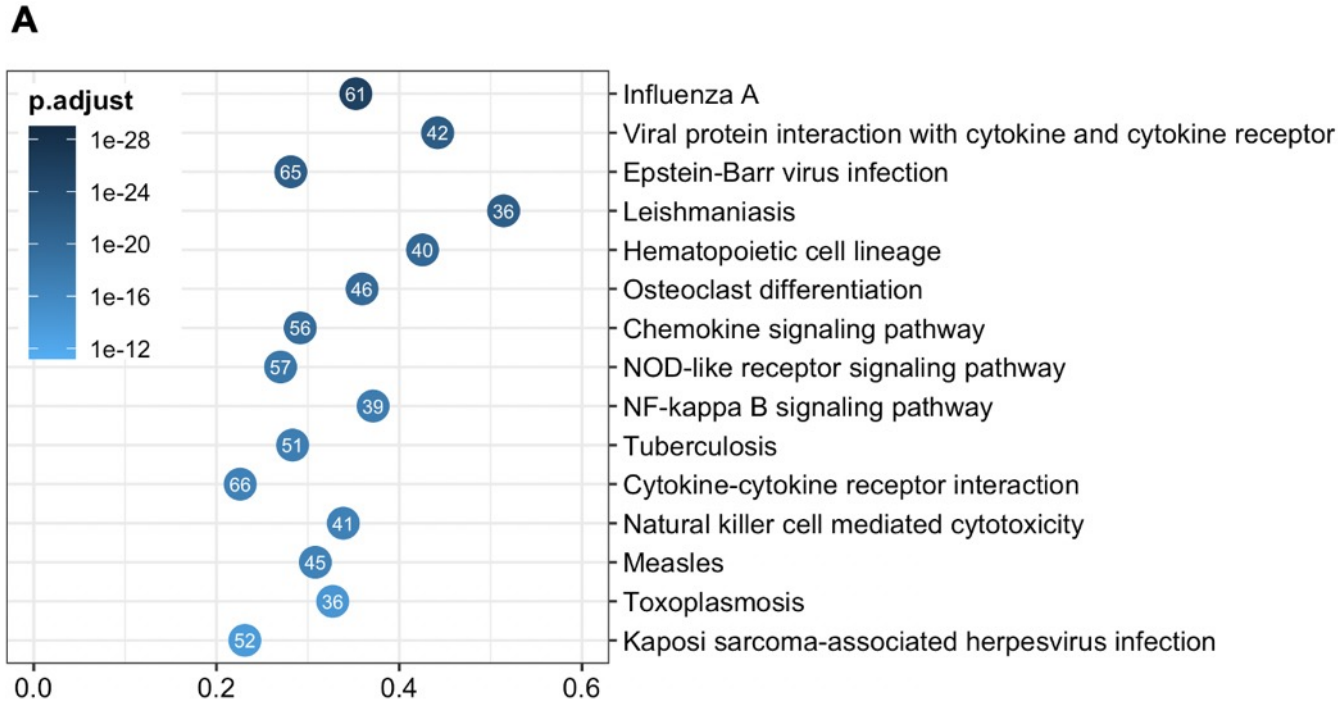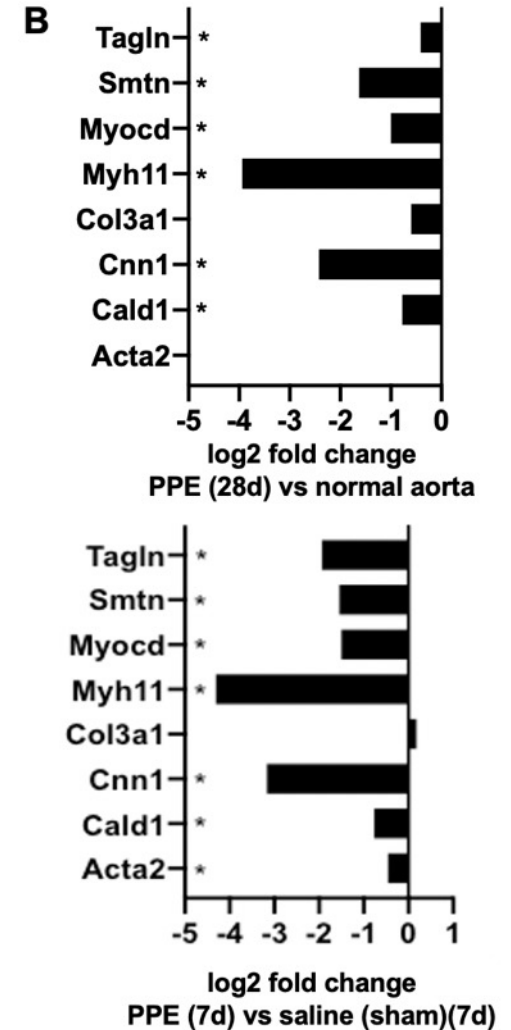

**Suppl. Figure 4: PPE MTA pathway analysis: (A)** KEGG-pathway gene overrepresentation analysis of significantly up-regulated genes (adjusted p-value < 0.05,  $F_c < -2$ ) at day 7 post PPE compared to sham (saline) controls, showing baseline transcriptomic characteristics of the model at the timepoint of lenvatinib treatment initiation. Top 15 significantly affected pathways are shown (adjusted p value is given in shades of blue). **(B)** Subset of contractile marker gene expression analysis of PPE mice aortic tissue on day 28 after aneurysm induction compared to untreated control aortas based on own MTA array data (upper panel). Similar analysis of PPE mice aortic tissue on day 7 after aneurysm induction compared to sham-treated (saline) aortas (lower panel) (\*=p<0.05).

Suppl. Fig. 5

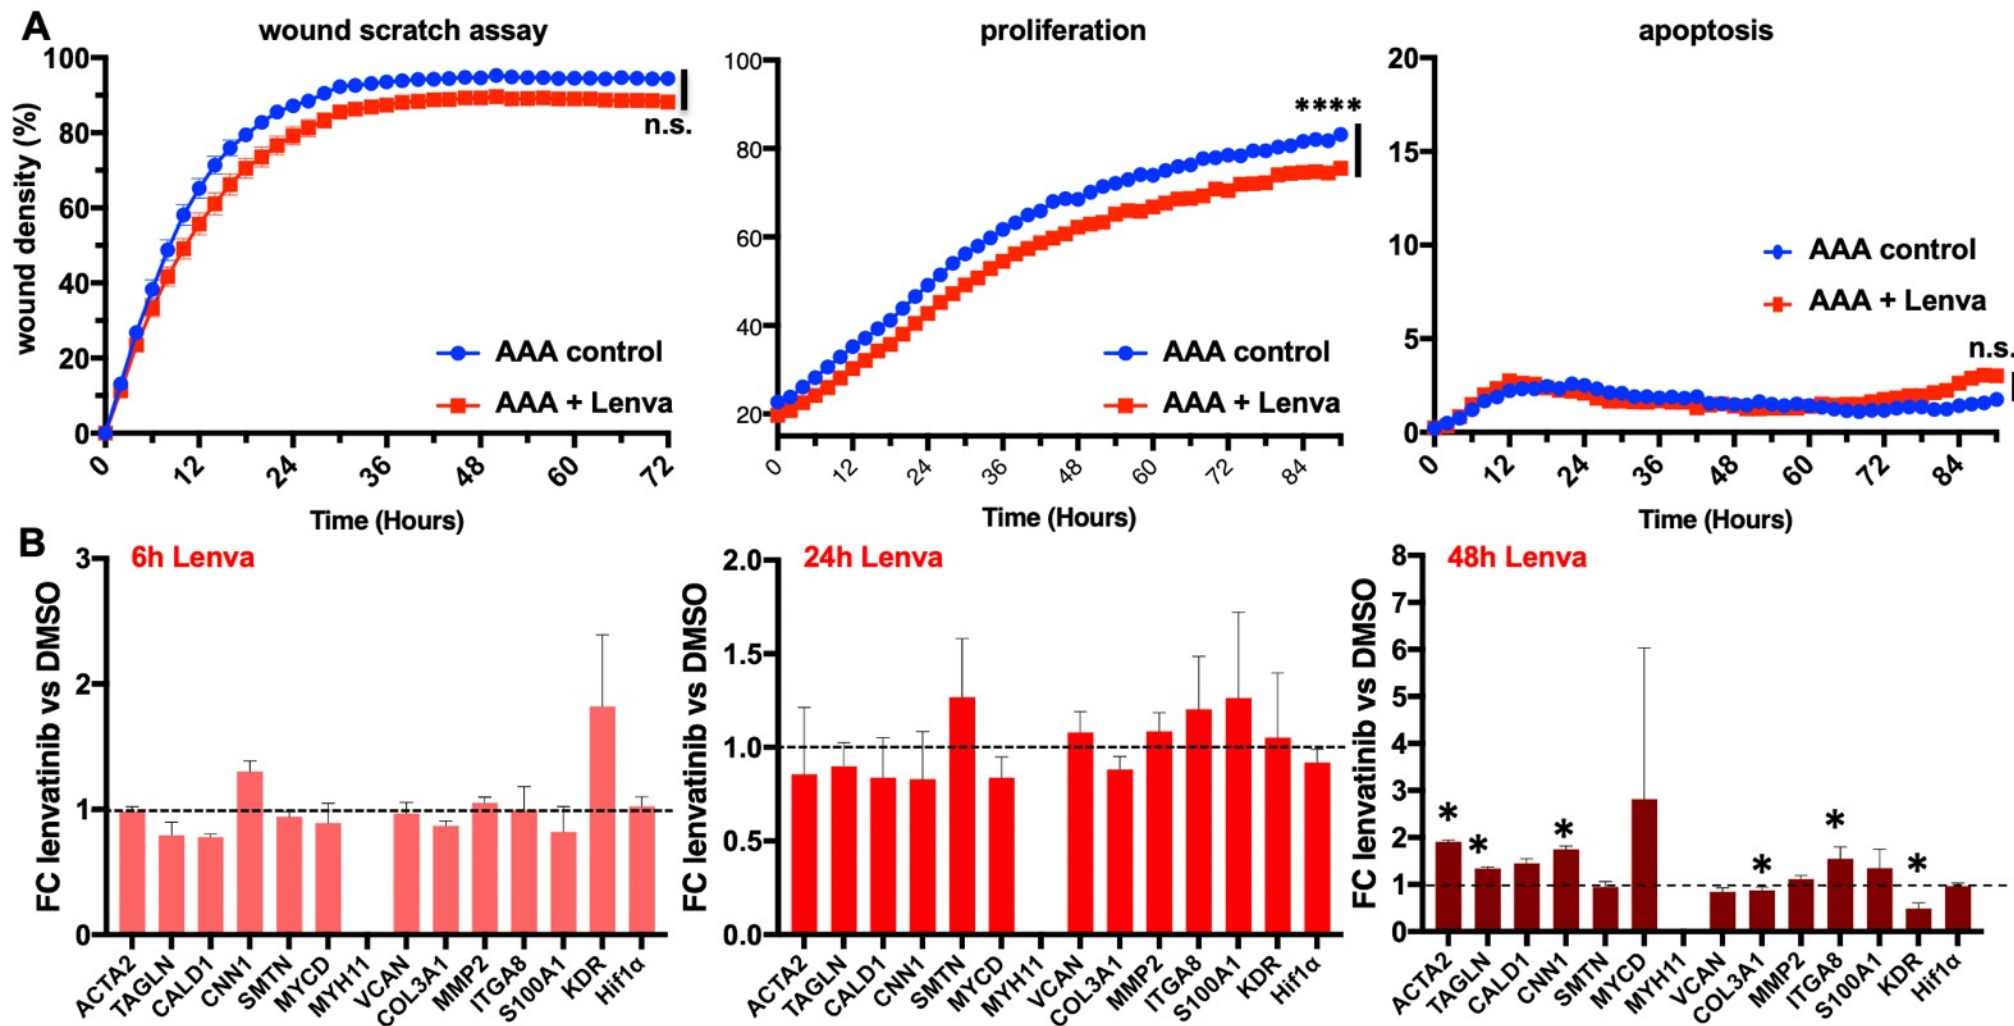

**Suppl. Figure 5: Lenvatinib effect on AAA patient-derived SMCs #3: (A)** Migration (left panel) proliferation (middle panel) and apoptotic (right panel) assays of AAA patient #3-derived SMCs exposed to lenvatinib. **(B)** A timely resolution of gene expression analysis at 6h, 24h, and 48h, assessing early and late effects of lenvatinib treatment on primary human AAA patient-derived VSMCs. (AAA control=treatment with 0.1% DMSO; \*=p<0.05; \*\*\*\*=p<0.0001; for list of genes, primers and assays used, a detailed explanation is presented in Suppl. Table 4)

## Suppl. Fig. 6

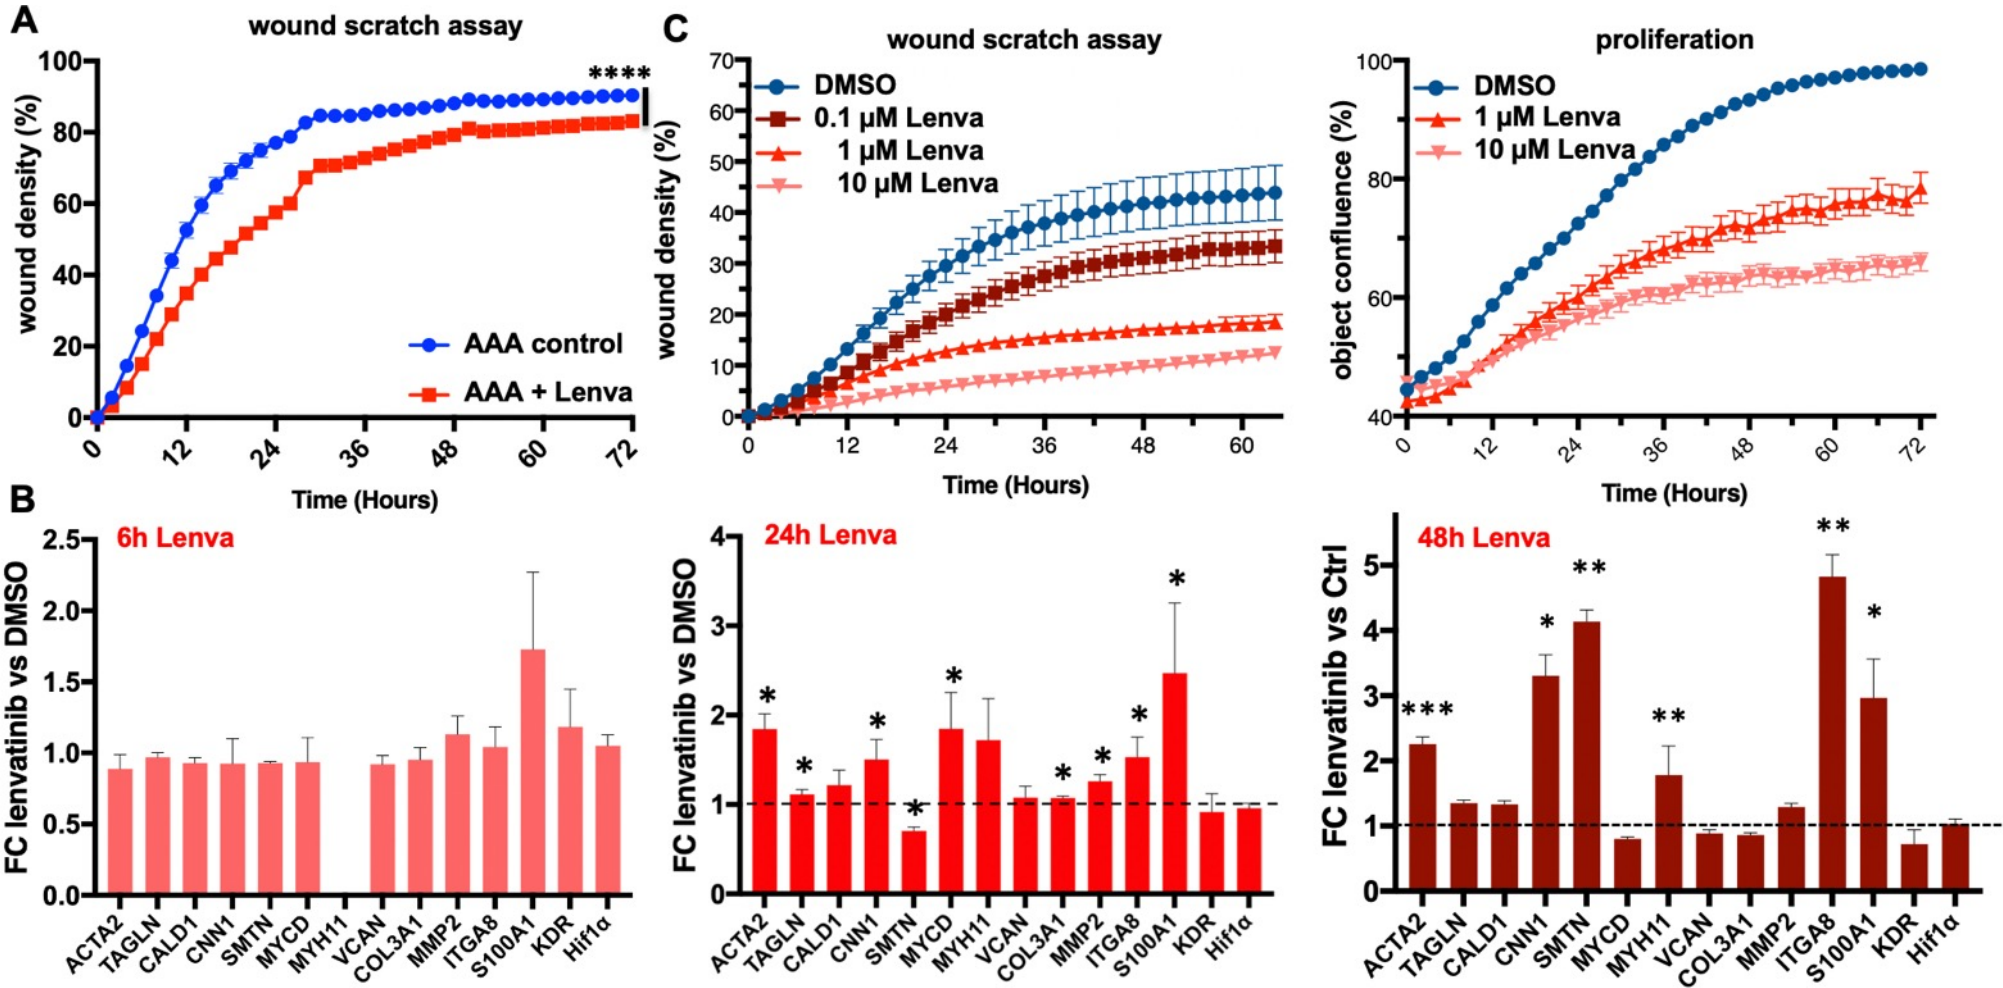

**Suppl. Figure 6: Lenvatinib dose-finding experiments and its effect on AAA patient-derived cells #2:** (A) Migration assays on AAA patient #2 derived SMCs. (B) A timely resolution of gene expression analysis after 6h, 24h, and 48h, assessing the early and late effects of lenvatinib treatment on primary human aortic cells. (C) Three doses of lenvatinib were evaluated by effects on migration (wound scratch assay) and proliferation (right panel). A dose of 0.1μM lenvatinib markedly reduced mobility and was thus chosen for all cell-based assays. (AAA control=treatment with 0.1% DMSO; \* $p < 0.05$ ; \*\*\*\* $p < 0.0001$ ; full list of genes, primers and assays are displayed in Suppl. Table 4)

Suppl. Fig. 7

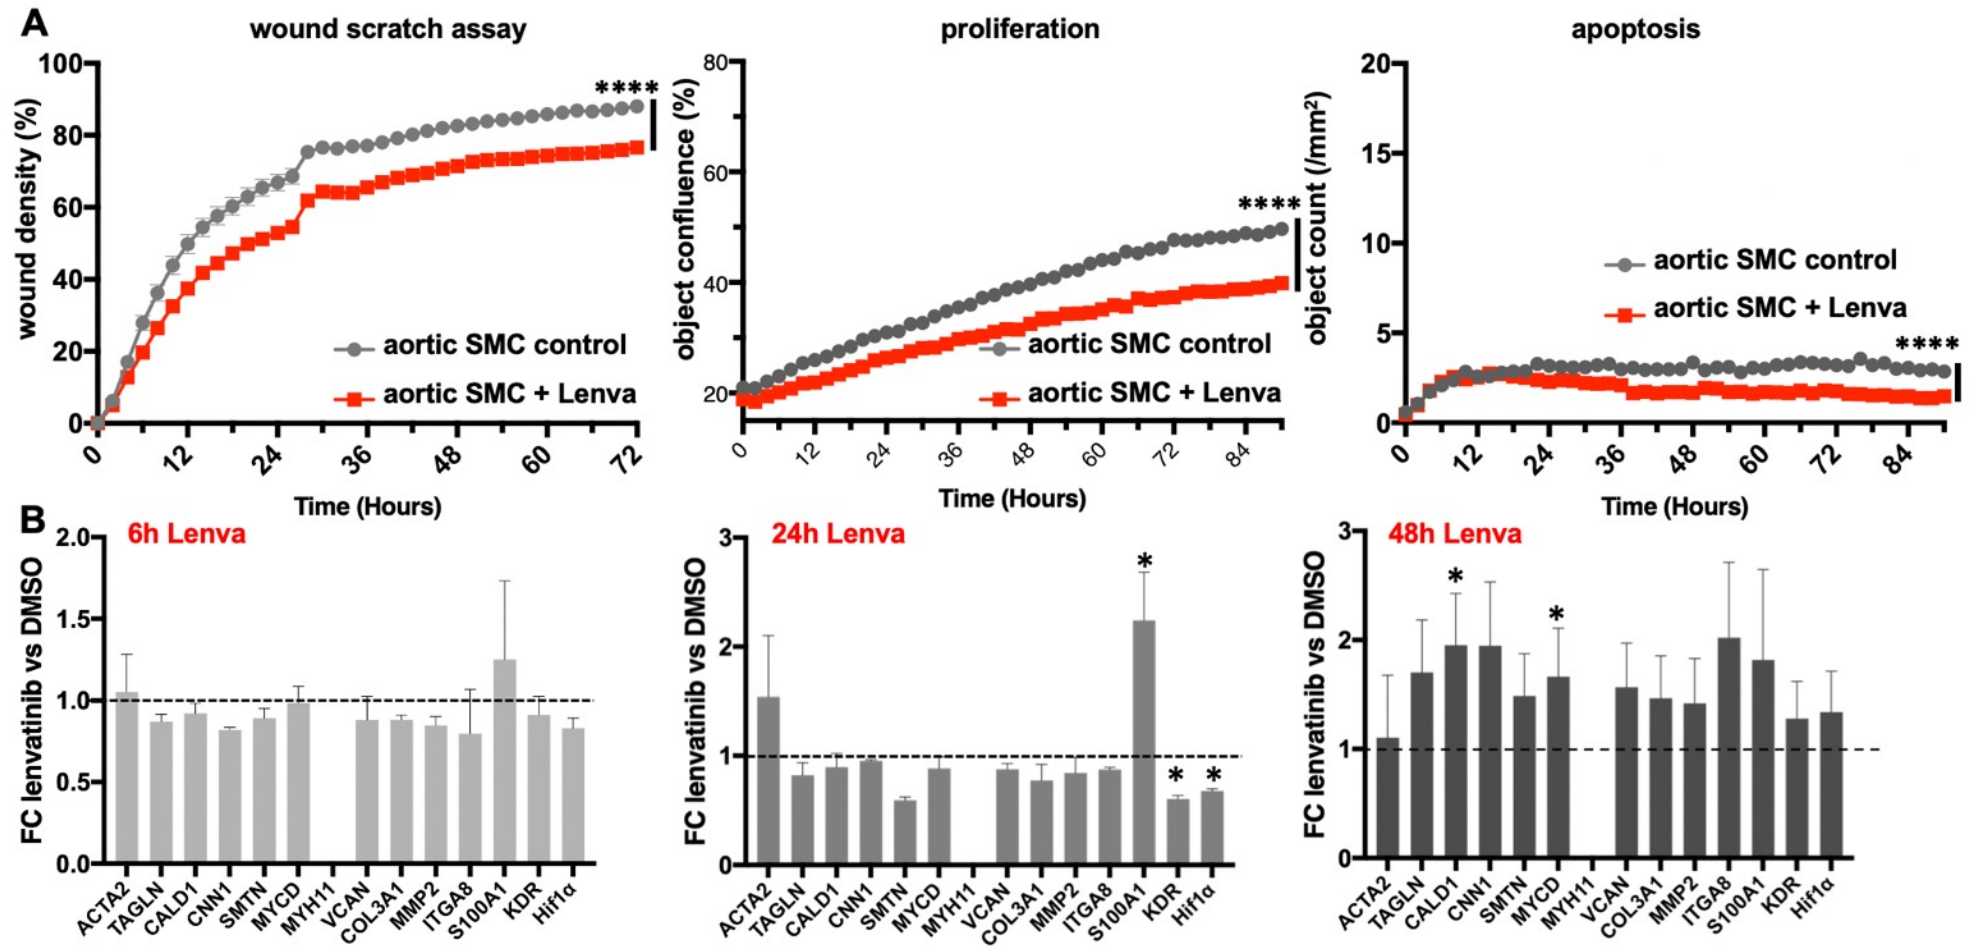

Suppl. Figure 7: Lenvatinib effect on healthy donor-derived SMCs (control cells): (A) Migration, proliferation and apoptosis assays upon lenvatinib treatment (from left to right panel). (B) A timely resolution of gene expression analysis at 6h, 24h, and 48h, assessing early and late effects of lenvatinib treatment on primary control VSMCs. (aortic SMC control=treatment with 0.1% DMSO; \*=p<0.05; \*\*\*\*=p<0.0001; full list of genes, primers, and assays are shown in Suppl. Table 4)

## Suppl. Fig. 8

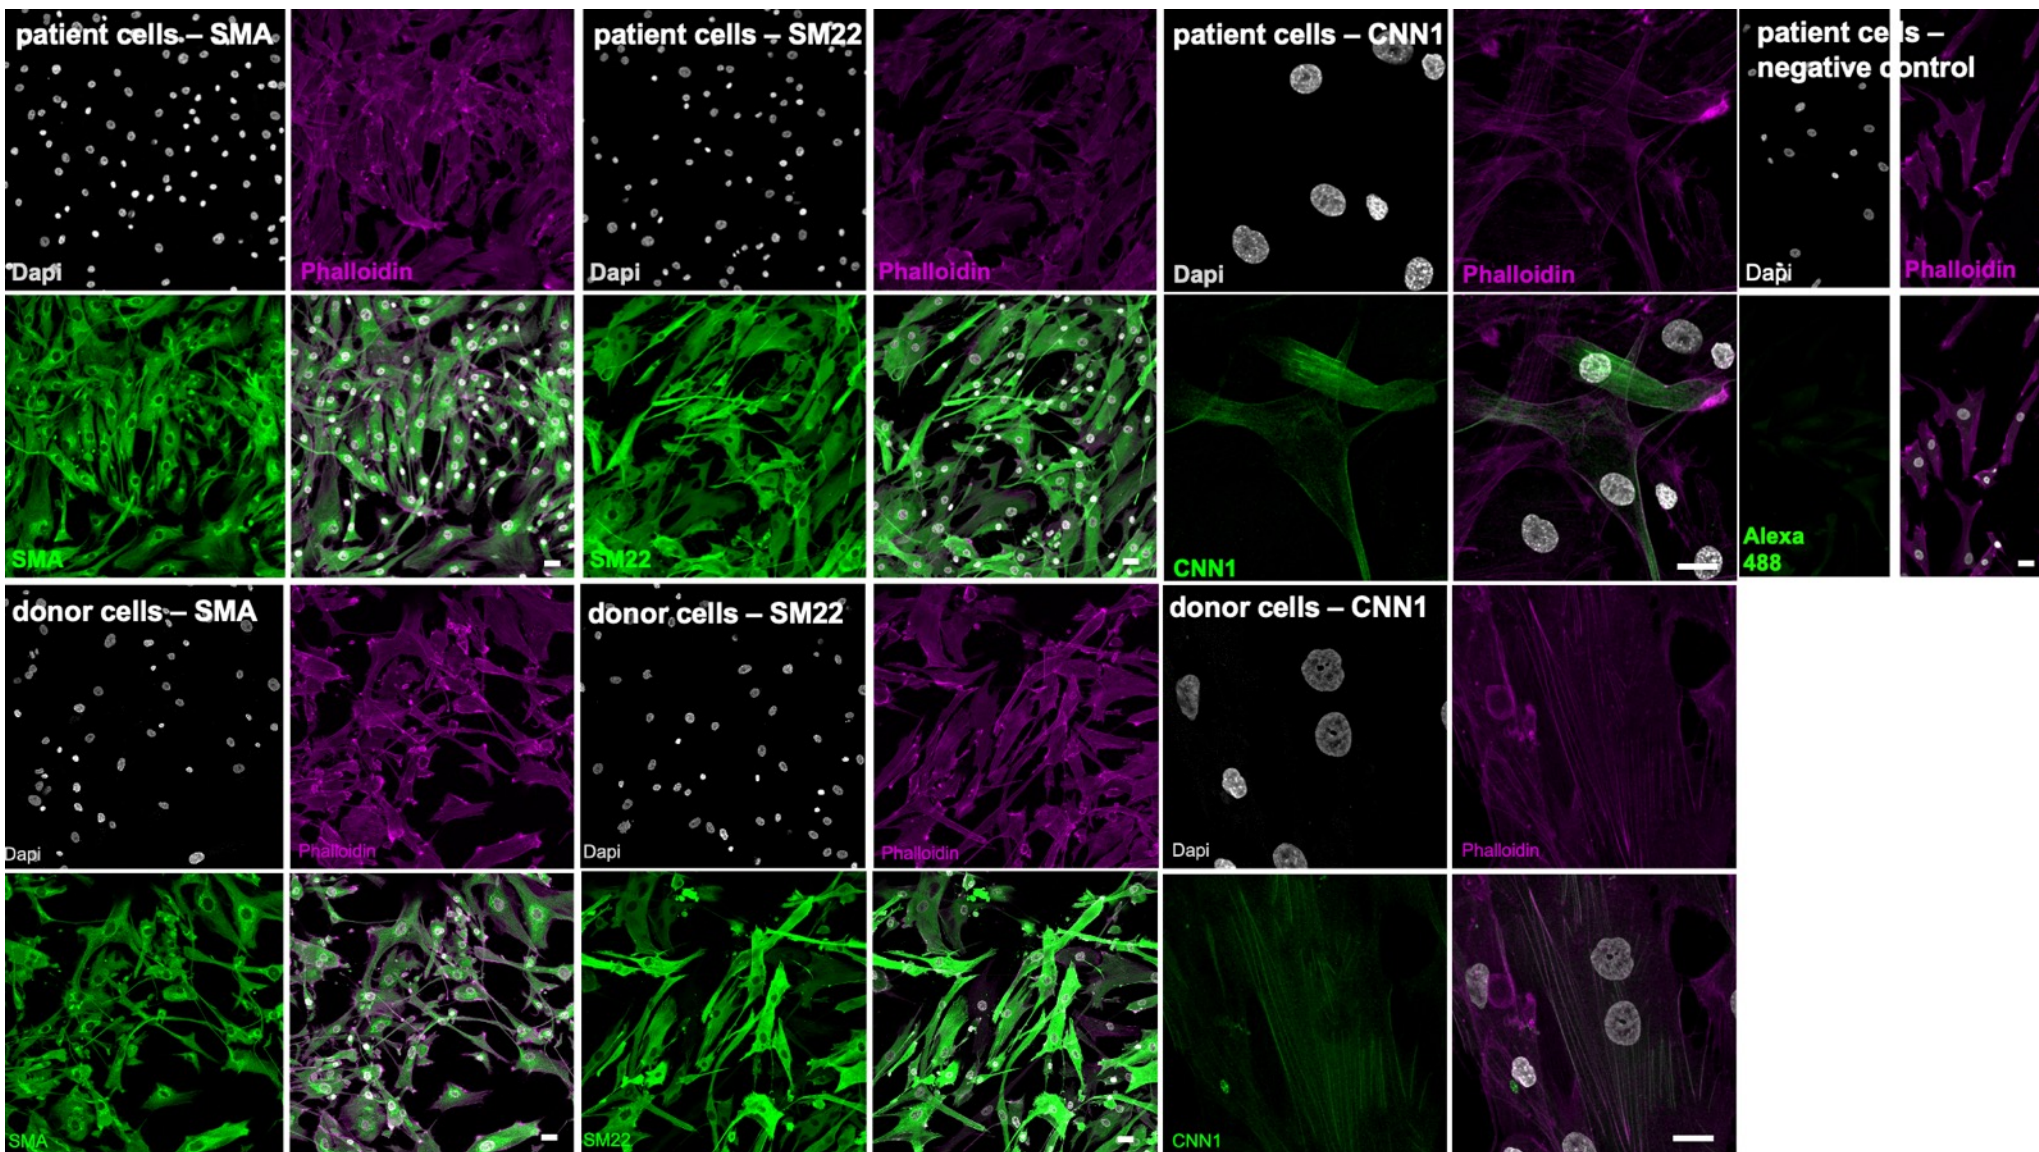

**Suppl. Figure 8: Characterization of AAA patient-derived SMCs and healthy donor SMCs:** Representative confocal laser scanning microscopy images of AAA patient-derived SMCs (patient #1 – upper panel) used for the previously described experiments. Staining for  $\alpha$ SMA, SM22, CNN1, and zoomed area for CNN1 are shown sequentially, in presence of cytoskeleton marker G-actin filament (phalloidin). Negative control for the green channel reveals little to no auto fluorescence within the cells. (20x/40x magnification; scale bar: 100 $\mu$ m). Lower panel shows the same stains for donor aortic cells.



## Suppl. Fig. 9

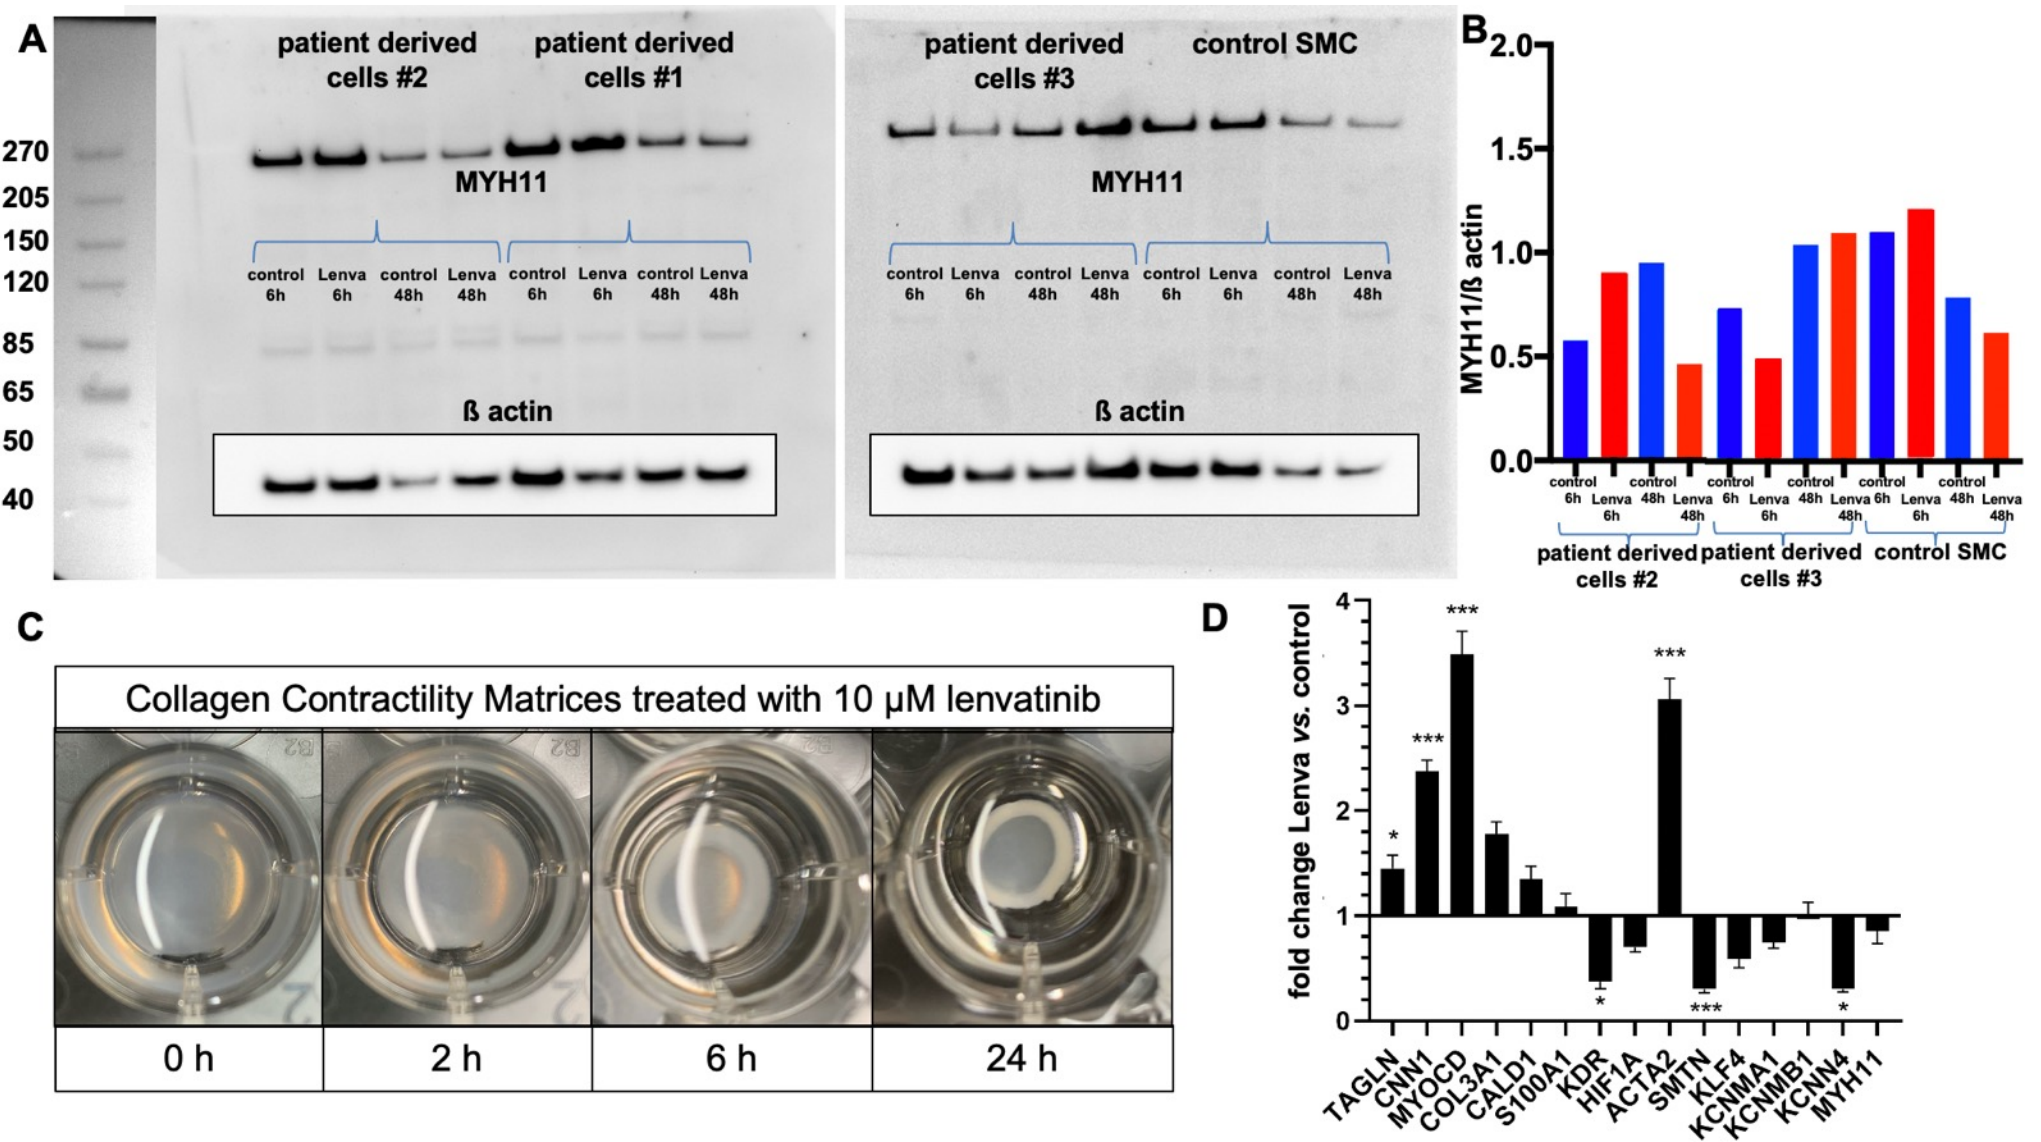

**Suppl. Figure 9: MYH11 complete Western Blot images from primary human cells and contractility assay:** (A) The two membranes show the staining of MYH11 in all 3 primary human AAA patient-derived cells (patient #1-3), and the healthy donor control cells.  $\beta$ -actin serves as loading control and for normalization, shown as an inset. Patient-derived cells #1 is blown-up and shown in Figure 4C. (B) Additionally, the quantification of the western blot images (MYH11 normalized to  $\beta$ -actin) is presented for all conditions (control treatment 6h/48h and lenvatinib 6h/48h). (C) Representative images of collagen matrices from the collagen contractility assay after treatment with lenvatinib reveals a time-dependent contraction of the matrix from 0-24h. (D) The gene expression analysis at 24h time point of the contractility assay shows upregulation of contractile VSMC genes (i.e. *ACTA2*, *TAGLN* and *MYH11*) upon lenvatinib treatment (\*= $p < 0.05$ ; mean  $\pm$  SEM) A subset of these genes is presented in Figure 4.

Suppl. Fig. 10

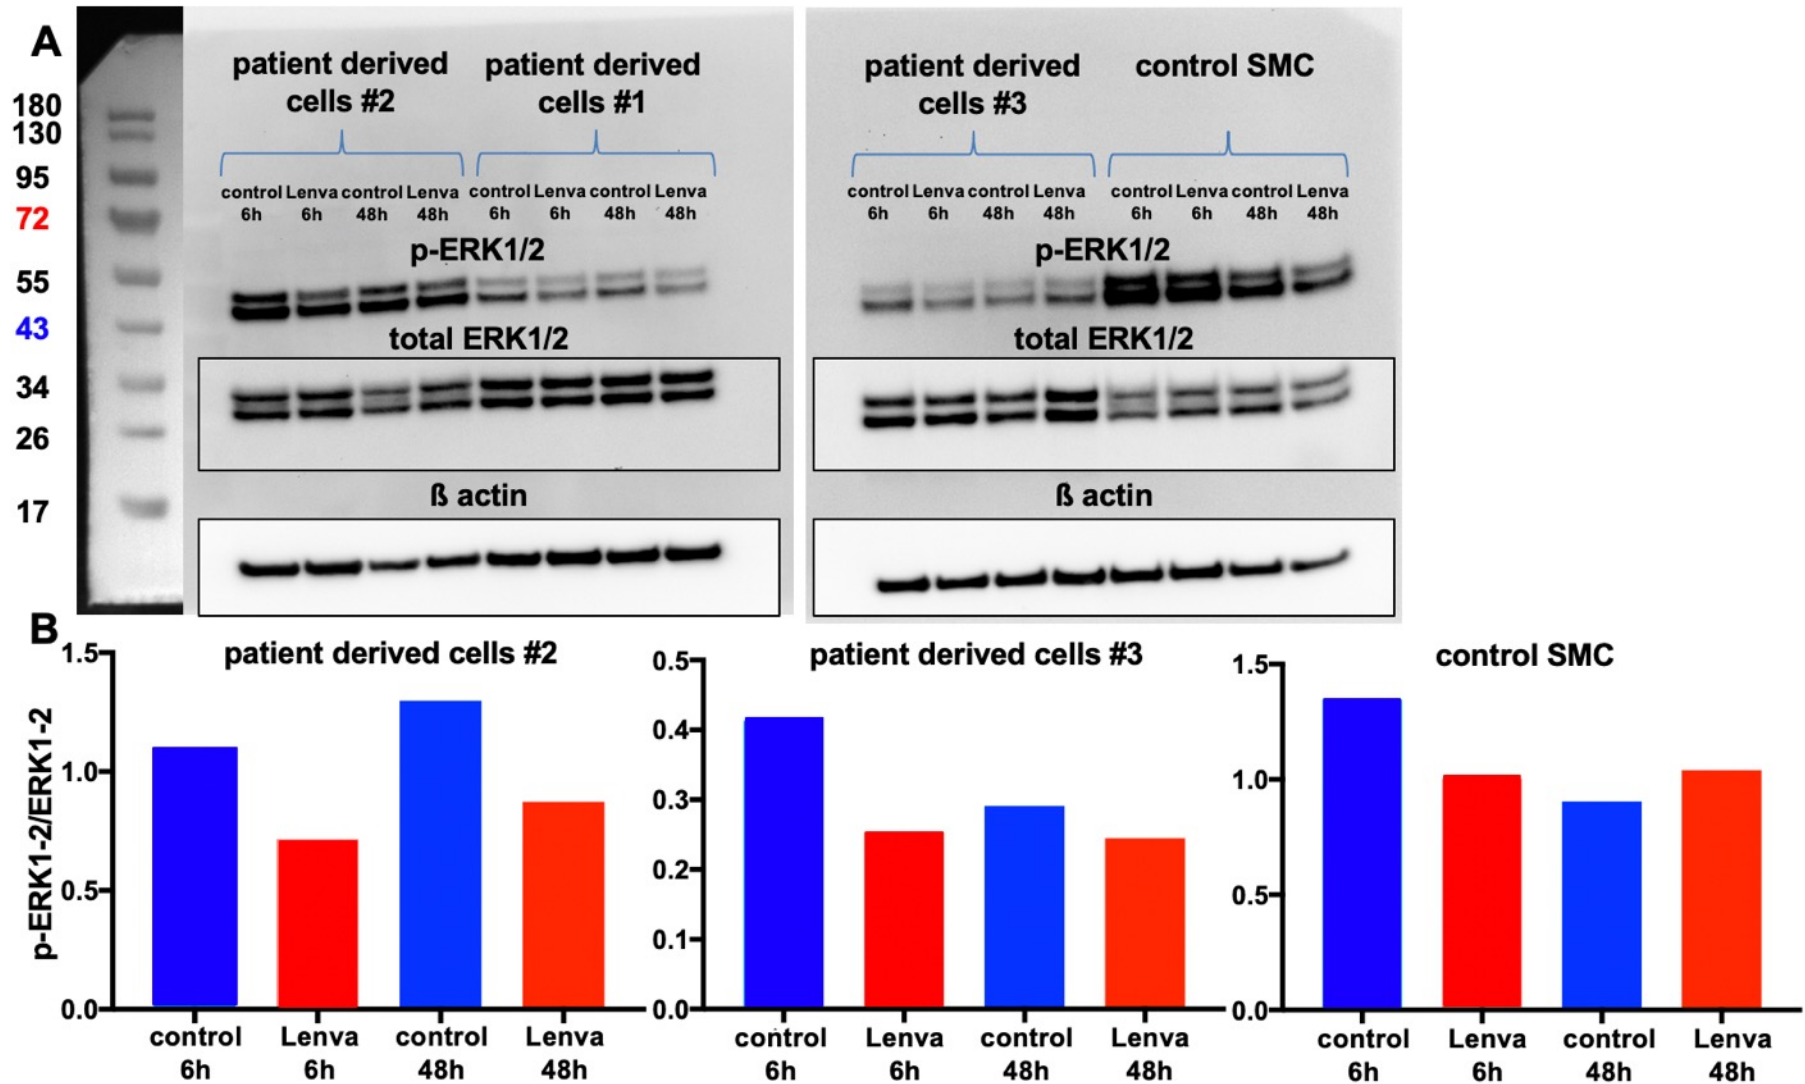

**Suppl. Figure 10: ERK1-2/pERK1-2 complete Western Blot images:** (A) The two membranes show the staining for pERK1-2/ERK1-2 for all 3 AAA patient-derived cells (#1-3) and the healthy donor control cells. Total ERK1-2 and  $\beta$ -actin as loading control are shown as an inset. One cell isolate (patient derived cells #1) is highlighted and presented in Figure 4D. (B) Additionally, the quantification of the Western Blot images (pERK1-2 normalized to ERK1-2) is shown for all conditions (control 6h/48h and lenvatinib 6h/48h).

Suppl. Fig. 11

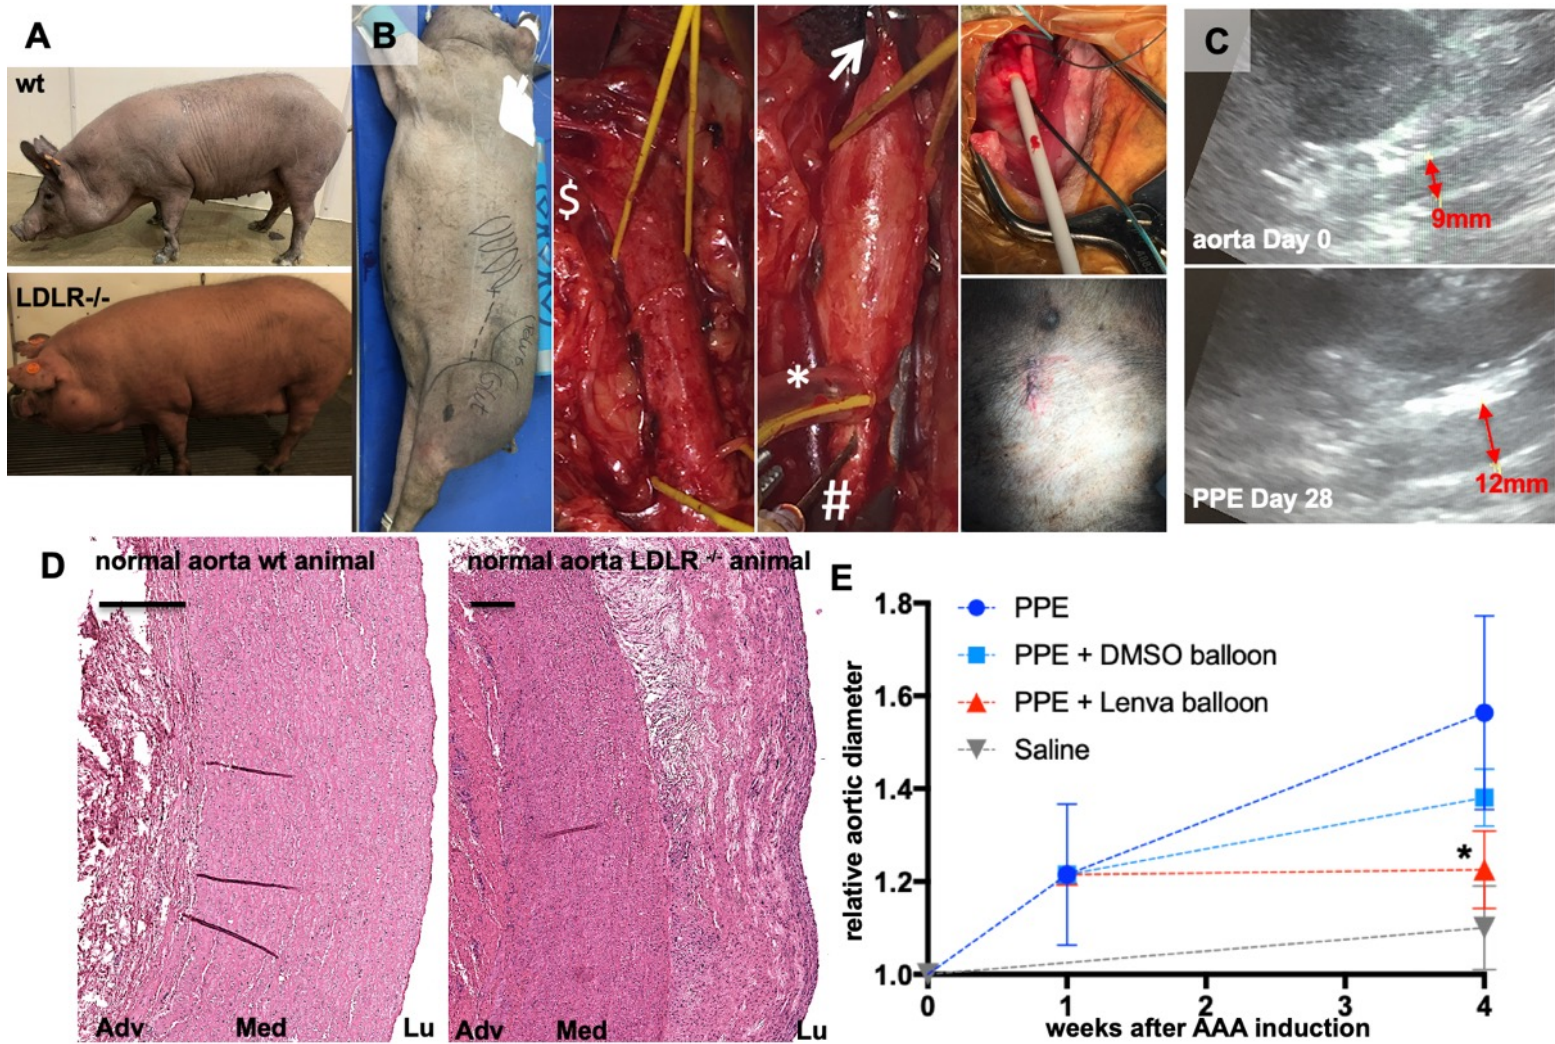

**Suppl. Figure 11: PPE-AAA in Yucatan minipigs:** (A) 12-months-old LDLR<sup>-/-</sup> (bottom) and wildtype (top) Yucatan minipigs demonstrating an obese phenotype upon gross appearance. (B) Pigs are placed on their right side and a left retroperitoneal approach exposes the infrarenal aorta from the lower renal artery (\$) to the aortic trifurcation. After ligation of the lumbar arteries, a Satinsky clamp (arrow) is applied, and the isolated segment is pressure-perfused with elastase via a blunt 5G needle (#) secured by an additional vessel loop tourniquet (asterisk). For the angioplasty (7 days after AAA induction), femoral access is achieved by a longitudinal incision into the right groin (bottom image), and a 5F introducer sheath is inserted after distal ligation of the vessel (top image). (C) Abdominal B-mode ultrasound is used to measure diameters of the infrarenal aorta, based on leading-edge technique at baseline (top), and after 1 and 4 weeks after aneurysm induction. (D) HE staining indicates non-calcified plaque formation with foam cells and cholesterol depositions in the endothelium and media of LDLR<sup>-/-</sup> compared to wildtype aorta. Note the cell-rich infiltrate at the border of plaques. (E) Intraluminal saline perfusion (grey) instead of PPE (dark blue) does not lead to aortic diameter enlargement. Endovascular control (DMSO as vehicle only) coated balloon (light blue) treatment at day 7 after AAA induction showed a trend towards smaller diameter, however, only lenvatinib coated balloon angioplasty (red) resulted in a significant diameter reduction compared to PPE (\*=p<0.05; mean ± SEM; PPE AAA induction at day 0; scale bar 200µm; Adv=adventitia; Lu=lumen; Med=Media).

Suppl. Fig. 12

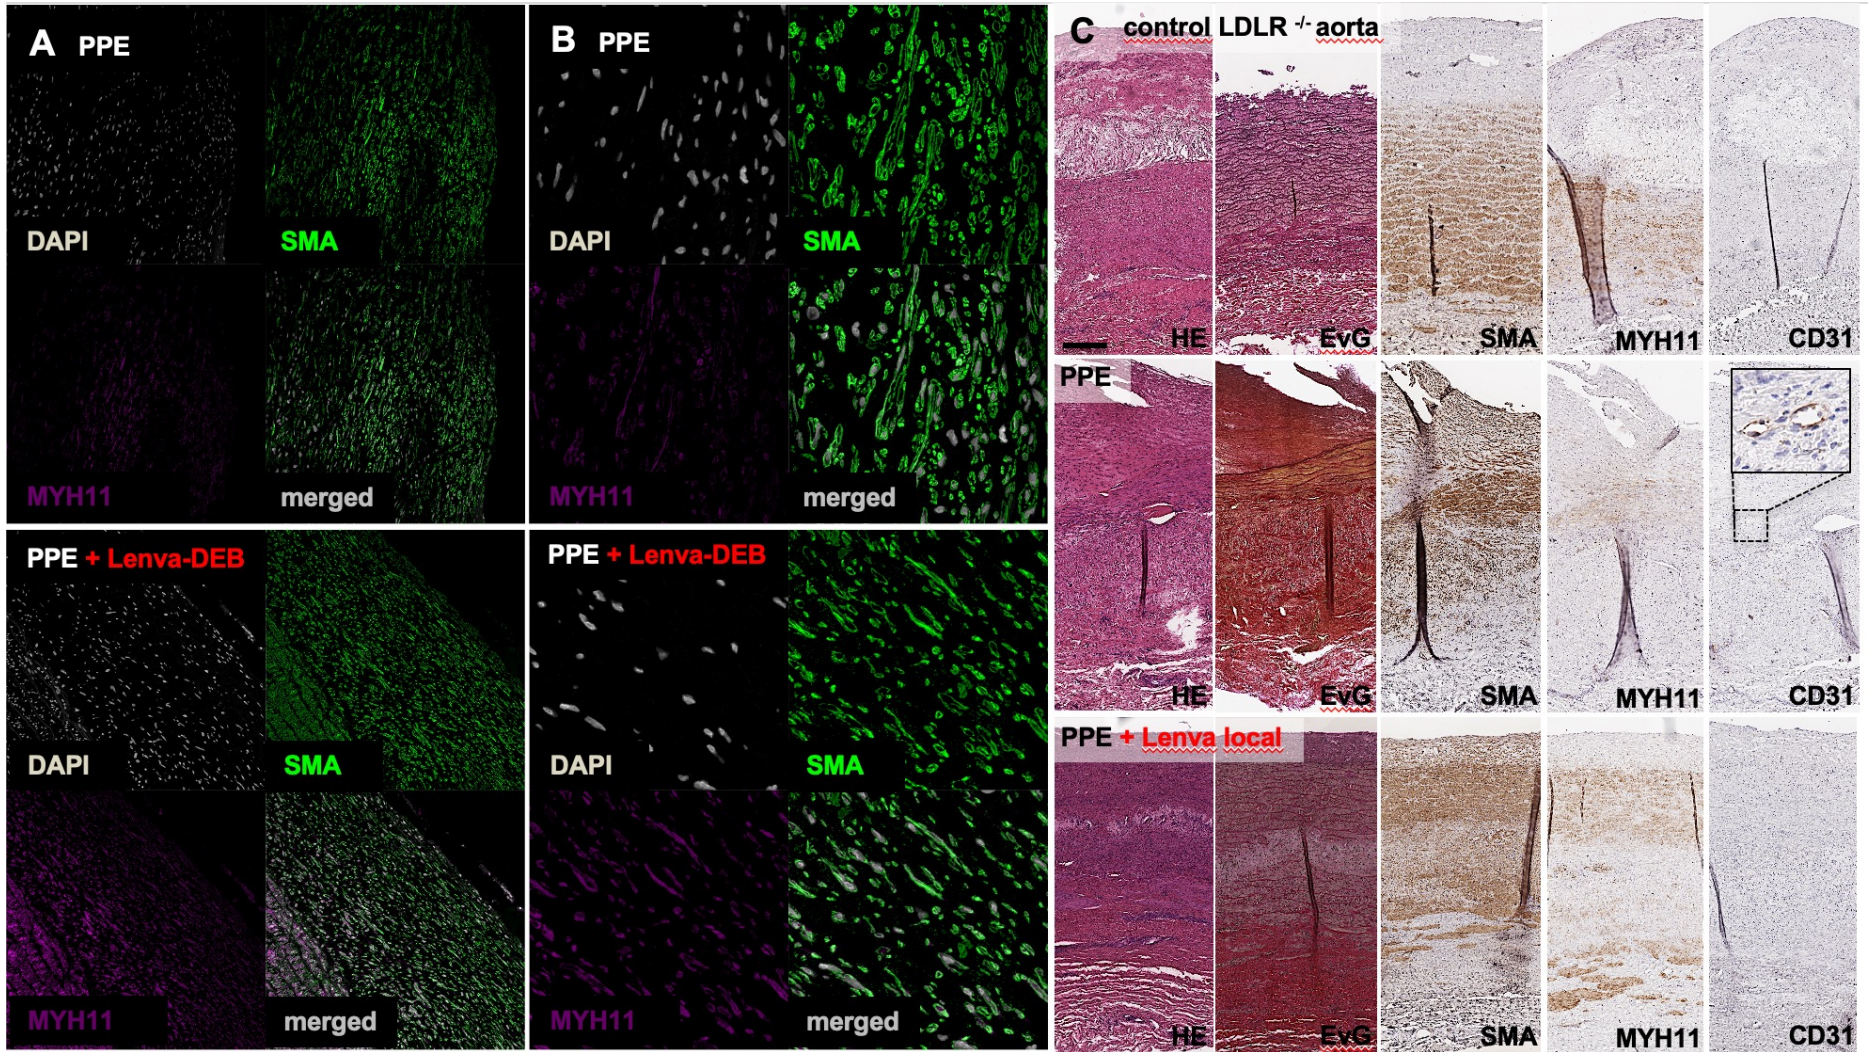

**Suppl. Figure 12: Minipig low and high magnification double IF and conventional IHC: (A,B)** Porcine double staining for  $\alpha$ SMA and MYH11 of the aortic media shown at 20x magnification in relation to higher magnifications using digital zoom (Lumen always oriented to the right). The high magnification images are also shown in Figure 6 B. **(C, upper panel)** Aortas of LDLR<sup>-/-</sup> minipigs present a wall structure with parallel orientated elastic fibers in the media and plaque formation in the intima/media (HE and EvG stains) **(C, middle panel)** VSMCs in the media are positive for  $\alpha$ SMA and MYH11, without indicating CD31 positivity. Upon PPE-AAA induction, elastic fibers become disrupted, and the parallel-layered structure of the media is vanished. Vast positivity for  $\alpha$ SMA remains, whereas only a few cells show MYH11. **(C, highlighted window)** CD31-positive neovessels are detected in the media and the thickened adventitia. **(C, lower panel)** In animals with PPE-induced aneurysms and local lenvatinib-coated balloon treatment, a more organized and parallel-layered structure is recovered. Elastic fibers remain disrupted, but cells show positivity for  $\alpha$ SMA and MYH11. CD31 positivity is not observed (magnification 5x; scale bar 100 $\mu$ m)

# Suppl. Fig. 13

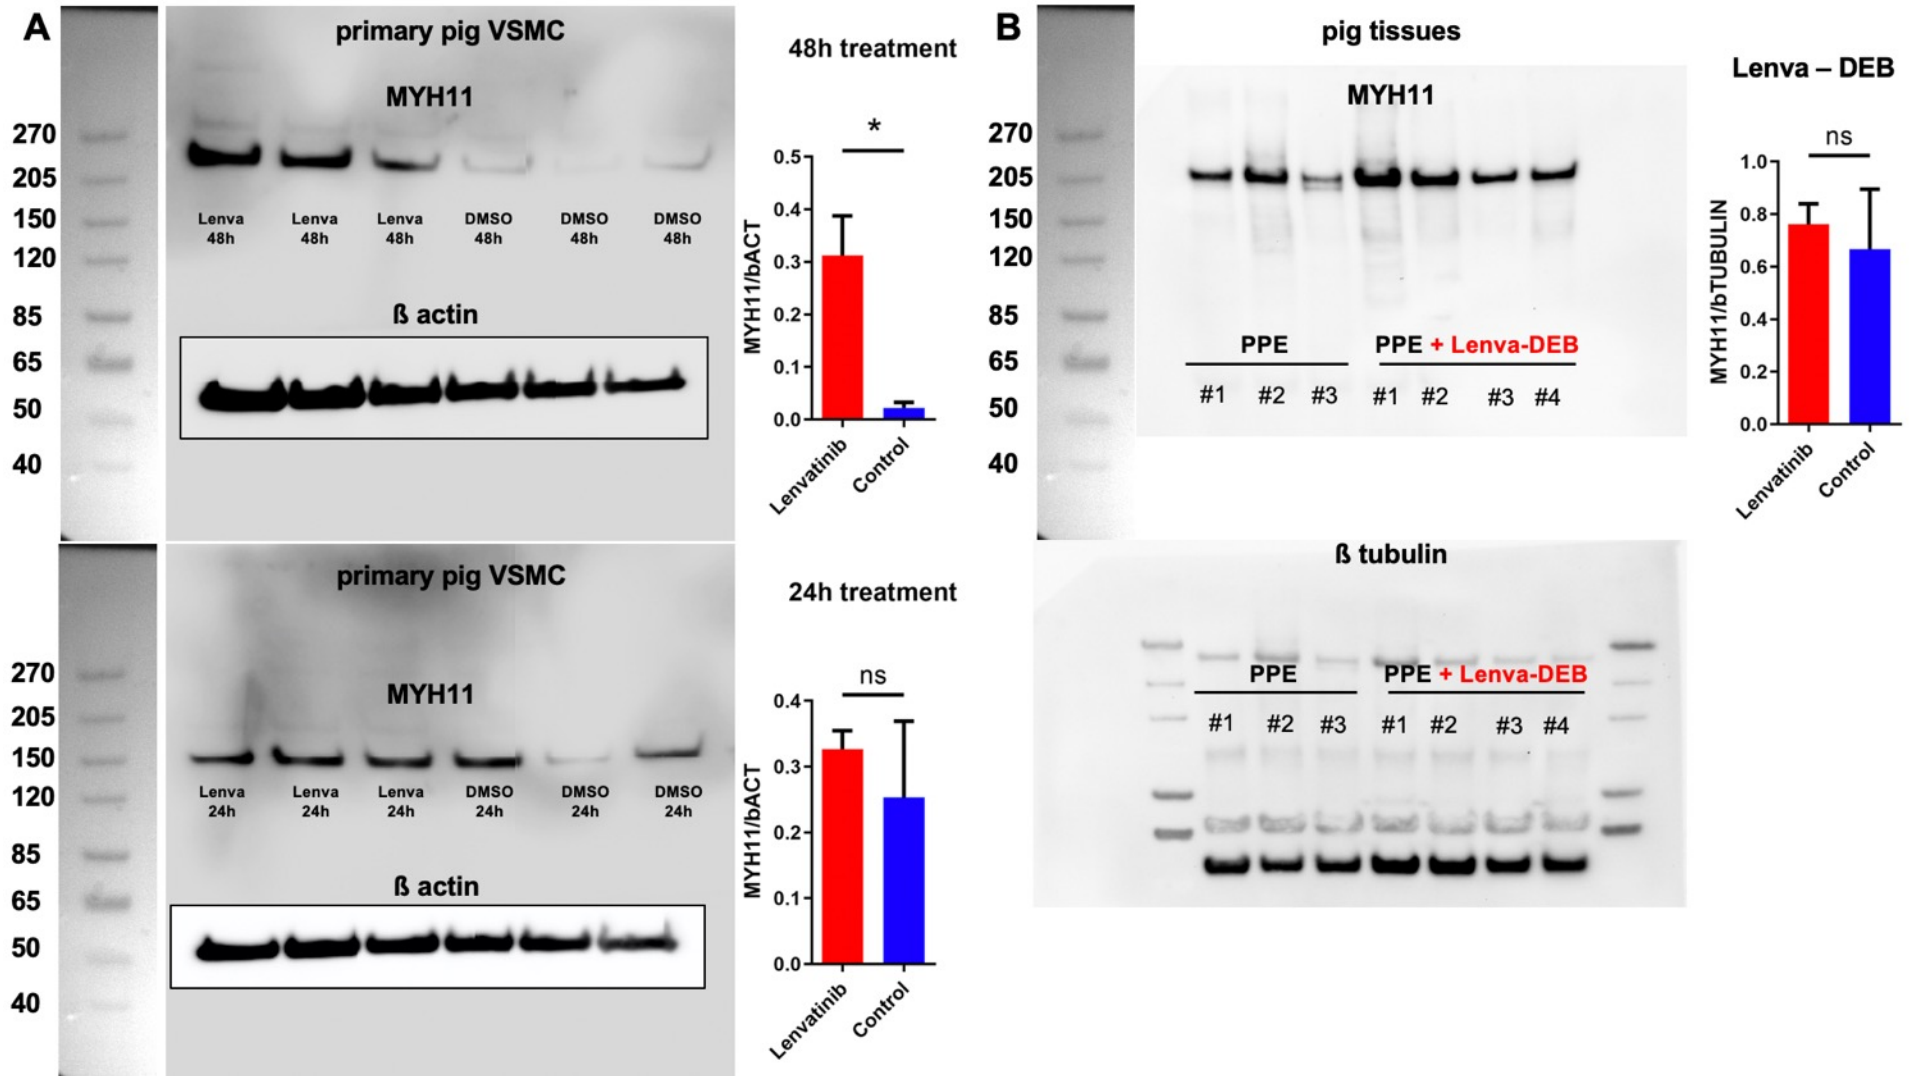

**Suppl. Figure 13: Complete Western Blots and quantification from primary porcine SMC culture and pig tissue lysates:** The two membranes show the staining for MYH11 (255kDa) after 24/48h incubation of primary porcine SMCs with lenvatinib or control treatment, respectively (**A**).  $\beta$ -actin (45kDa) is used for normalization and presented as an inset. The 48h-time point is highlighted and presented in Figure 5F. (**B**) Additionally, the membranes and quantification of the staining intensity comparing MYH11 and  $\beta$ -tubulin (55kDa) in lysates from pigs treated with the PPE + Lenva-DEB versus PPE only show a trend of higher MYH11 protein abundance. This membrane is also shown in Figure 5E.

Suppl. Fig. 14

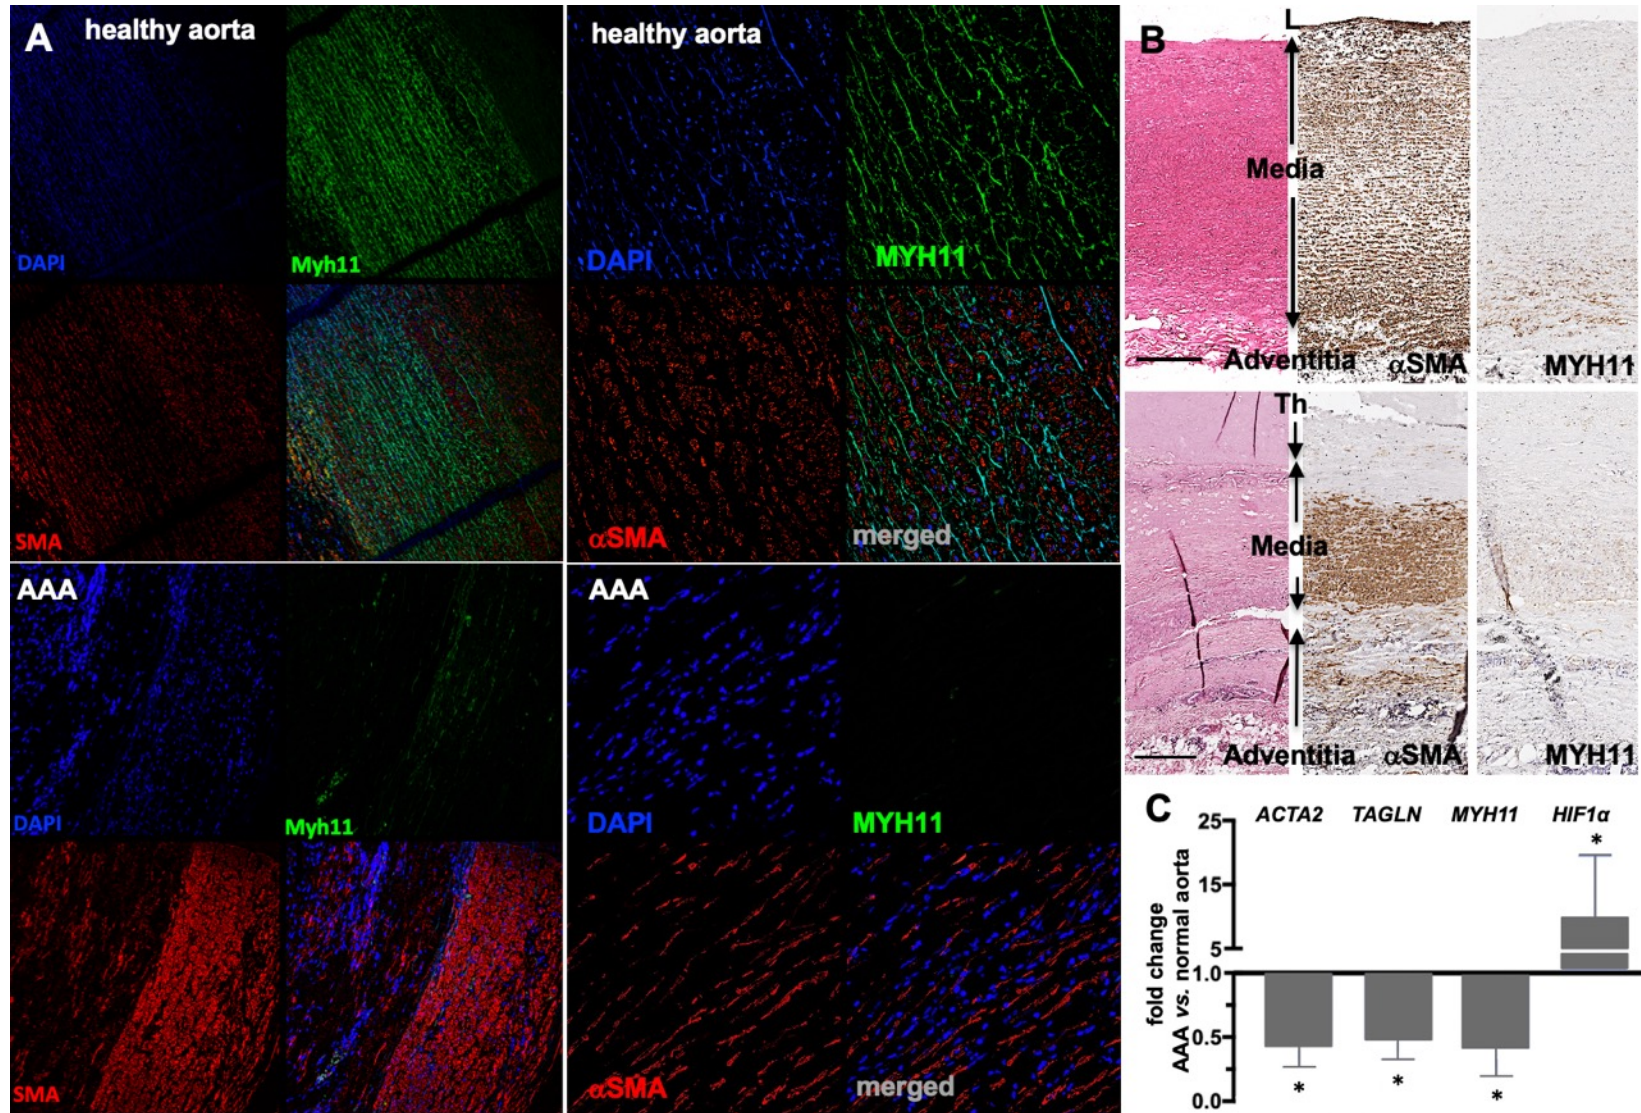

**Suppl. Figure 14: Human AAA characterization I:** immunofluorescence analysis reveals the distribution pattern of filamental  $\alpha$ SMA and MYH11 in the aortic media, and a disruption of this co-expression in AAA in low and high magnification (20x/63x) (**A**). The non-aneurysmatic human infrarenal aorta has a densely organized media with approximately 30 layers of elastic fibers in parallel orientation with  $\alpha$ SMA and MYH11 positive VSMCs (**B – upper panel**). In AAA, massive disruptions in the media and in elastic fibers are detectable (**B – lower panel**).  $\alpha$ SMA positivity remains in the media, whereas MYH11 vanishes (Lu=Lumen; Adv=Adventitia; Med=Media; Th=Thrombus; magnification 2.5x/40x; scale bar 200 $\mu$ m). Gene expression in human AAA and non-aneurysmatic aortic tissues reveal indicators of the contractile VSMC phenotype (*ACTA2*, *TAGLN* and *MYH11*) significantly reduced, whereas *HIF1 $\alpha$*  expression is enhanced (\*= $p$ <0.05; mean  $\pm$  SEM) (**C**).

## Suppl. Fig. 15

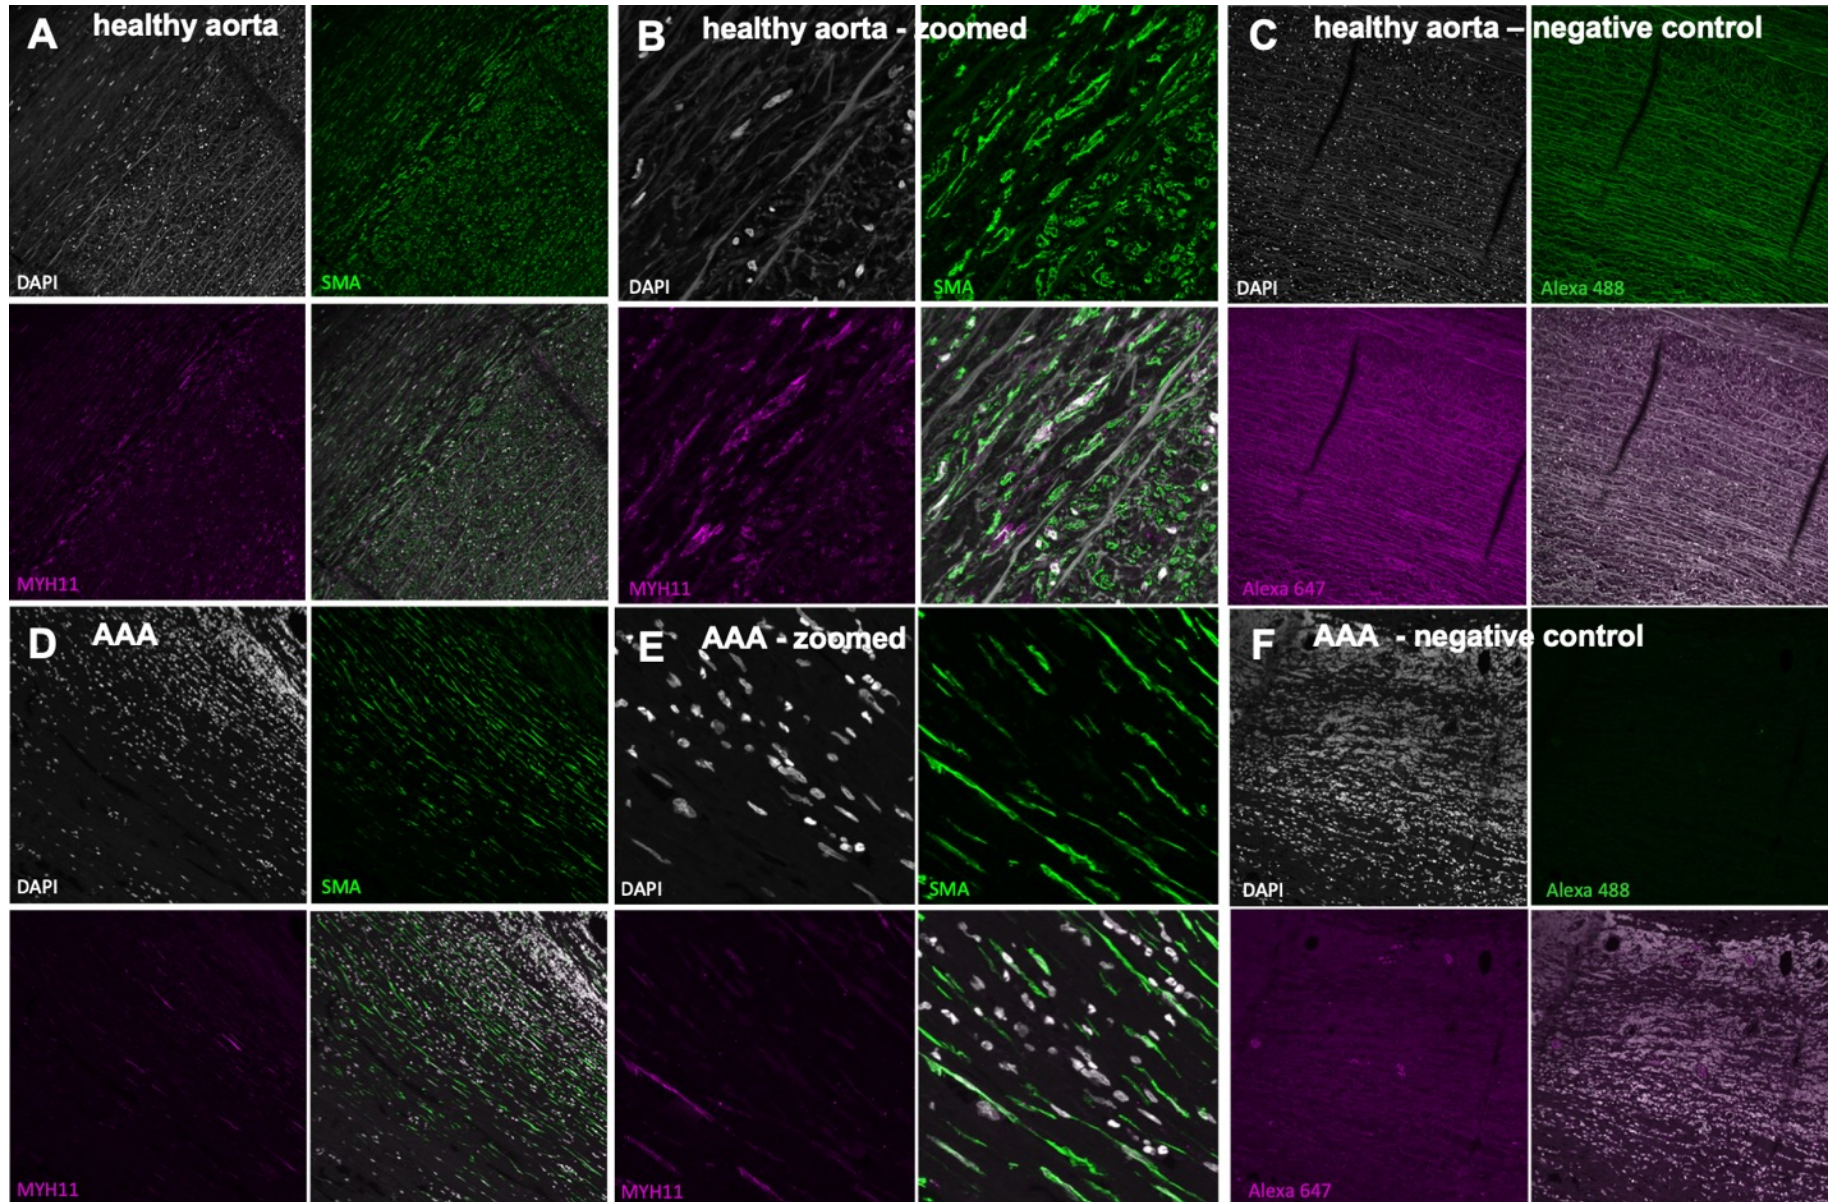

**Suppl. Figure 15: Human AAA characterization II:** Double immunofluorescence (different secondary antibodies as compared to Suppl. Figures 12, 14) in healthy (upper panel) and AAA (lower panel) aortas. In healthy tissues there is positive signals for  $\alpha$ SMA and MYH11 (as highlighted in the zoomed area) whereas MYH11 is barely detectable in AAA specimens. The negative control with secondary antibody only reveals the unspecific background staining typical for vascular tissues. (scale bar: 100 $\mu$ m)

## Online data supplement – Supplementary Material and Methods

### Mouse PPE experiments:

S. **study approval section** for ethics declaration.

**Anesthesia and PPE Procedure:** Anesthesia was induced with isoflurane, while analgesia was provided with Temgesic (4mg/kg) before and after surgery. The aorta was isolated, and a temporary proximal and distal sutures were placed. Aneurysms were then induced with porcine pancreatic elastase (PPE; SigmaAldrich, Stockholm, Sweden) at a final concentration of 2 U/mL for 10 min by inserting a microcatheter into the aortic lumen. The aorta was then flushed with warm saline, and a single knot suture (10-0) was placed to seal the catheter entry site. After layered closure of the abdomen, the animal was allowed to recover on a heated mat.

**Murine ultrasound:** B-mode ultrasound was performed under general anesthesia with isoflurane using a Vevo 770 system and a Vevo Imaging Station (both Visualsonics, San Antonio, TX, USA). Our protocol for diameter assessment has been described before.(1) (detailed ultrasound data in Suppl. Table I)

**Euthanasia and tissue processing:** In all experiments presented in this study, animals were sacrificed 4 weeks after aneurysm induction using CO<sub>2</sub>. Operations and images were performed using the operating microscope LEICA EZ4HD with a built in camera and the Leica Acquire Version 3.1 software (both Leica Microsystems, Buffalo Grove, IL, USA). Tissue samples were collected at the time of animal sacrifice. The dilated part of the aorta was carefully dissected and then cut in half. One part was kept for formalin fixation for histochemistry, and the second part was placed in RNAlater (SigmaAldrich, Stockholm, Sweden) and stored at -80°C awaiting further analysis. Control tissue was non-dilated infrarenal aorta from an additional six animals (also 10 week old male C57BL/6J wild type mice (Taconic, Biosciences, Hudson, NY, USA) sacrificed explicitly for this purpose.

### Mouse AngII experiments:

S. **study approval section** for ethics declaration.

**Anesthesia and AngII Procedure:** 18 mice were purchased from Charles River (Sulzfeld, Germany). Ang-II (BACHEM, Switzerland) was dissolved in saline for the required dose of 1000 ng/kg/min at a pump distribution rate of 0.25 µl/h. The Alzet osmotic pumps (Model 2004, DURECT Corporation) were filled with Ang-II solution and conditioned over night at 37°C in saline. Animals were anesthetized and the Alzet osmotic pump was inserted into a subcutaneous pocket lateral of the spine, with the flow moderator facing downwards.

**Murine ultrasound:** For ultrasound measurements of aneurysms, the following settings of the Vevo 2100 Imaging System (FUJIFILM VisualSonics Inc., Toronto, ON, Canada) were applied: gain 30 dB, image depth 9 mm, image width 8 mm. Respiratory gating was set to 25% delay and a window of 50%; T1 50 ms were used for ECG trigger. After localization of the left renal artery, the MS550 transmitter was moved 6 mm cranially for automated scan of the suprarenal aorta. 157 imaging frames were generated over a scan distance of 12 mm with 0.076 mm step size. The suprarenal aortic volume was calculated in mm<sup>3</sup> (over the monitored distance of 12



mm) with Vevo Lab 3.1.1 software; images of ECG-gated kilohertz visualization were used to additionally determine the maximum diameter of the aorta (inner-to-inner wall) at maximal blood flow as described before.(2) Independent measurements by three observers were averaged in volume and diameter calculations (Suppl.Fig.2).

**Euthanasia and tissue processing:** please see section above on PPE experiments.

Mouse RNA extraction:

Approximately 1mm long pieces of mouse aortic tissue were homogenized in Qiazol using Multi-Gen probes (Pro-Scientific, Stockholm, Sweden). RNA extraction was performed using the Qiagen miRNeasy Micro Kit (Qiagen, Sollentuna, Sweden) following the manufacturer's protocol. Total RNA concentration was assessed using a NanoDrop 2000 spectrophotometer (Thermo Fisher Scientific, Waltham, MA, USA). In the MTA analysis (Affymetrix, Santa Clara, CA, USA), samples from  $n=6$  PPE,  $n=7$  PPE+Lenvatinib, and  $n=5$  control aortas were included with RIN numbers between 5.7-9.8. The MTA procedure was performed by the Center for Molecular Medicine (CMM) core facility at Karolinska Institutet, Stockholm, Sweden, according to the manufacturer's protocol.

Mouse Immunohistochemistry:

5 $\mu$ m sections were stained for different targets with an overnight protocol with primary antibodies (Suppl. Table 3). Endogenous peroxidase activity was quenched with hydrogen peroxide for 10 min (Merck, Darmstadt, Germany). Target staining was done with the Vectastain ABC and the Peroxidase Substrate kit (both Vector Laboratories, Burlingame, CA, USA) after species-specific secondary antibody incubation. Counterstaining was performed using Mayer's hematoxylin (Carl Roth, Karlsruhe, Germany). Negative control, including incubation with phosphate buffered saline instead of primary antibody, was done for each antibody. Slides were then imaged with a Keyence BZ9000 microscope (Keyence, Kyoto, Japan) and scanned with a NanoZoomer 2.0-HT Digital slide scanner C9600. Pictures were analyzed with the NDP.view2 software (both Meyer Instruments, Hamamatsu, Japan). Image analysis was performed with AZ AnalyserII software (Keyence), as well as Imaris (Oxford Instruments, Zurich, Switzerland) and Fiji ImageJ for high power field (HPF) analysis of cell counts.

Mouse OCT frozen sections were fixed in 4% paraformaldehyde PBS buffered solution and incubated with primary Ki-67 antibodies (Abcam, ab16667) 1:200 overnight. To visualize staining TSA Plus Cyanine 5 Evaluation Kit (PerkinElmer, NEL745E001KT) was applied in 1:50 dilution. Sections were mounted with ProLong Gold (ThermoFisher), and images were taken using a confocal Leica SP5 microscope.

For each mouse aorta, 2 slides were stained for the respective antibody and out of these, the most representative image was chosen for presentation.

Overview animal experiments (animal numbers):

| <b>mouse experiments</b> |                                 |                           |
|--------------------------|---------------------------------|---------------------------|
| <i>group</i>             |                                 | <i># animals</i>          |
| untreated control aorta  |                                 | 5                         |
| PPE                      | PPE only                        | 11                        |
|                          | + systemic Lenvatinib treatment | 7                         |
|                          | + local Lenvatinib treatment    | 5                         |
|                          | + local sham (PBS) treatment    | 3                         |
| AngII                    | w/o oral gavage                 | 5 completed<br>4 ruptures |
|                          | + oral gavage Lenvatinib        | 6 completed<br>3 ruptures |
| <b>pig experiments</b>   |                                 |                           |
| PPE                      | PPE only                        | 7                         |
|                          | + local Lenvatinib DEB          | 4                         |
|                          | + local sham (DMSO) DEB         | 3                         |
| untreated control aorta  |                                 | 3                         |

Minipig PPE-AAA experiments:

**S. study approval section** for ethics declaration.

**Anesthesia:** The basic anesthesia regime included: Sedation by combination of ketamine 15mg/kg, azaperone 2mg/kg and atropine 0.1mg/kg intramuscularly. An intravenous catheter was placed in the lateral auricular vein. Induction of anesthesia by propofol (4-8 mg/kg) and oral intubation with a 7.0-8.5 mm cuffed endotracheal tube. Anesthesia was maintained by continuous infusion of propofol (2.5-7mg/kg/h). Pigs were mechanically ventilated in volume-controlled mode (6-10ml/kg) with 40-50% oxygen (1-2l/min) and breathing rate 11-13x/minute. Parameters were adjusted to maintain normocapnia (end-tidal CO<sub>2</sub>: 35-45mmHg). Saline was infused at a maintenance rate of ~10 ml/kg/h. Intraoperative monitoring included reflex status, heart rate and peripheral arterial oxygen saturation. External warm-air supply was provided. A single-shot cefuroxim (750mg) was administered before skin incision. For multimodal analgesia during the surgery, metamizole (50mg/kg), carprofen (4mg/kg) and fentanyl (0.001–0.01mg/kg) were administered.

**Ultrasound:** Ultrasound was performed immediately after anesthesia before any further procedure by 2 independent examiners (A Busch and/or C Knappich) using a GE Logiq S7 system equipped with a 4-5MhZ abdominal ultrasound probe (GE, Frankfurt, Germany). The aortic trifurcation and the renal arteries were identified and aortic diameter was acquired using the leading edge method in transverse and longitudinal sections at the point of maximum diameter (Suppl. Figure 9C; Suppl. Table II).(3)

**Postoperative analgesia:** After each surgery, carprofen (4mg/kg) orally for at least 5 days and a single dose of buprenorphine (0.005–0.1mg/kg) shortly before the end of anesthesia were given to each pig. After the first surgery (induction of aneurysm), the administration of buprenorphine was continued for at least 2 days.

**Blood sampling:** Blood sampling (10ml) under anesthesia was performed at day 0, day 8±2 (catheterization) and day 28 ±3 (euthanasia) *via* the lateral auricular vein or femoral artery. Parameters: Blood cell count, alkaline phosphatase, AST, ALT,  $\gamma$ -GT, GLDH, bilirubin total, creatinine, urea, albumin, total protein, glucose (Suppl. Table III).

**Euthanasia:** After a final ultrasound examination the animals were sacrificed under general anesthesia with pentobarbital (>50mg/kg) and 40ml of 1M KCl solution.

*Minipig tissue collection and processing:*

Directly after euthanasia, the incisional wounds were reopened and access to the infrarenal aorta was gained in order to identify the area of the aneurysmatic lesion. Samples were collected from the AAA, the surgically untouched pararenal aorta (no additional animals were sacrificed for control tissue sampling), the common carotid, the iliac and the coronary arteries, the aortic valve, the left ventricle myocardium, a jugular lymph node, liver, kidney, spleen and lung parenchyma, as well as whole blood in EDTA and serum. All samples were divided for RNA isolation and snap frozen in liquid nitrogen and formalin fixation.

*Minipig RNA extraction and qPCR experiments:*

Approx. 3mm sections of aortic tissue were homogenized with the Bio-Gen PRO200 Homogenizer and Multi-Gen 7XL Probes (PRO Scientific, Oxford, CT, USA) after adding Qiazol. RNA extraction was performed using the miRNeasy Mini Kit (Qiagen, Hilden, Germany), according to the manufacturer's protocol and total RNA concentration was determined with a NanoDrop2000c (Thermo Fisher Scientific, Waltham, MA, USA).

300ng RNA were reverse-transcribed using the High-Capacity RNA-to-cDNA Kit (Thermo Fisher Scientific, Waltham, MA, USA). mRNA expression was measured based on qRT-PCR using TaqMan FAM labelled assays. Amplification was performed on a QuantStudio 3 PCR System (Thermo Fisher Scientific, Waltham, MA, USA) and all samples were normalized to RPLP0 (Ribosomal Protein Lateral Stalk Subunit P0). RNA expression was calculated by the  $\Delta\Delta C_t$  method and displayed as fold change compared to untreated pig aortas proximal to the surgically treated segment with a relevant distance.

*Minipig immunohistochemistry:*

2 $\mu$ m sections of paraffin-embedded tissue were mounted on SuperFrost slides (Thermo Fisher Scientific, Waltham, MA, USA) and standard hematoxylin-eosin (HE) and Elastica van Gieson (EVG) stains were performed.

For immunohistochemistry (IHC), sections were mounted on 0.1% poly-L-lysine (Sigma-Aldrich, St. Louis, MO, USA) pre-coated SuperFrost Plus slides (Thermo Fisher Scientific, Waltham, MA, USA). For antigen retrieval the slides boiled in a pressure cooker with 10nM citrate buffer (distilled water with citric acid monohydrate, pH 6.0), and endogenous peroxidase activity was blocked with 3% hydrogen peroxide. Samples were incubated with primary antibodies (Suppl. Table 3) diluted in Dako REAL Antibody Diluent (Dako, Glostrup, Denmark). Slides were then treated

with biotinylated secondary antibodies and target staining was performed with peroxidase conjugated streptavidin and DAB chromogen (Dako REAL Detection System Peroxidase/DAB+, Rabbit/Mouse Kit; Dako, Glostrup, Denmark). Mayer's hematoxylin (Carl Roth, Karlsruhe, Germany) was used for counterstaining and appropriate positive and negative controls were performed for each antibody. All slides were scanned with an Aperio AT2 (Leica, Wetzlar, Germany), and images were taken with the Aperio ImageScope software (Leica, Wetzlar, Germany).

#### Primary porcine SMC isolation:

Porcine aorta material of healthy landrace pigs was harvested and stored in complete DMEM/F12 Medium (Sigma Aldrich, Taufkirchen, Germany containing 5% FBS and 1% PS). The tissue was placed in a sterile petri dish and washed with PBS. Adventitia and intima were removed, and the remaining media was cut into small pieces using a sterile scalpel. These were placed in digestion medium (1.4mg/ml Collagenase A, Roche, Mannheim, Germany, in complete DMEM/F12 Medium) in a humidified incubator at 37°C and 5% CO<sub>2</sub> for 4-6 h. Cells were strained using a 100µm cell strainer to remove debris. After 2 washing steps (centrifuge 400g, 5 min; discard supernatant, re-suspended in 15ml complete DMEM/F12 Medium) cells were re-suspended in 7ml complete DMEM/F12 Medium and placed in a small cell culture flask in a humidified incubator at 37°C and 5% CO<sub>2</sub>. Medium was changed every other day. After 1 week the medium was replaced by SMC Growth Medium (PeloBiotech, Planegg, Germany). Upon confluence, cells were stored in liquid nitrogen or processed immediately. Cells were used between passages 3-7.

#### Incubation of pSMC with Lenvatinib and Western Blot:

Cells: Cells were placed in triplicates in 25cm<sup>2</sup> flasks and treated with 0.1µM lenvatinib in OptiMEM (Thermo Fisher, USA, Lenvatinib-treatment) or 0.1% DMSO in OptiMEM (control-treatment) for 24h and 48h. Cells were washed with ice-cold PBS and harvested with 250µl freshly prepared complete RIPA Buffer (RIPA Lysis and Extraction Buffer, Thermo Fisher, USA) containing Phosphatase Inhibitor Cocktail 2 and 3 (Sigma Aldrich, USA) and Halt Protease Inhibitor Cocktail (ThermoFisher). After homogenization with a pestil and centrifugation for 20 min (14.000rpm at 4°C), the supernatant was frozen down at -80°C in aliquots of total protein lysate. Total protein concentration was measured using the Pierce BCA Protein Assay Kit (Thermo Fisher), following the manufacturer's instruction.

Western Blot for MYH11: 5µg of protein of each sample was denatured and reduced at 70°C for 10min, then separated in a NuPage 3-8% Tris Acetate-Gel and transferred onto Trans-Blot Turbo Mini-Size LF-PVDF Membranes (BioRad, USA). The blots were blocked with 5% BSA in Tris-buffered saline+0.1%Tween-20 for 1h, followed by overnight incubation with the primary Rabbit Anti-smooth muscle Myosin heavy chain 11 antibody (ab53219, Abcam, United Kingdom) in TBS-T + 5% BSA. After washing with TBS-T, blots were incubated with anti-rabbit IgG H&L HRP (horseradish peroxidase)-conjugated secondary antibody (ab205718, Abcam, United Kingdom) and visualized using ECL Prime Western Blotting Detection Reagent

(RPN2236) in the c600 System from Azure Biosystems (Dublin, CA, USA), cSeries Capture Software v2.1.4.0731

Western Blot for  $\beta$ -actin (loading control): 5 $\mu$ g of protein of each sample (exact same batch as for MYH11 WB) was denatured and reduced at 70°C for 10min, then separated in a Bolt 4-12% Bis-Tris Plus Gel (Thermo Fisher) and transferred onto Trans-Blot Turbo Mini-Size LF-PVDF Membranes (BioRad, USA). The blots were blocked with 5% milk powder in Tris-buffered saline+0.1% Tween-20 for 1h, followed by overnight incubation with the primary antibody against  $\beta$ -actin (A1978, Sigma Aldrich, Taufkirchen) in TBS-T+5% milk. After washing with TBS-T, blots were incubated with anti-mouse IgG H&L HRP (horseradish peroxidase)-conjugated secondary antibody (ab205719 Abcam, United Kingdom) and visualized using ECL Prime Western Blotting Detection Reagent (RPN2236) in the c600 System from Azure Biosystems (Dublin, CA, USA), cSeries Capture Software v2.1.4.0731.

The blots were quantified using Fiji ImageJ Software.

#### Primary human AAA cells RNA isolation and qPCR:

Cells were placed in 6-well plates (triplicates each) and treated with 0.1 $\mu$ M lenvatinib in OptiMEM (Thermo Fisher, USA, Lenvatinib-treatment) or 0.1% DMSO in OptiMEM (control-treatment) for 6, 24 and 48h. Cells were washed with PBS and harvested with 350 $\mu$ l RLT Lysis Buffer (Qiagen, Netherlands). Total RNA was isolated using the RNeasy Mini Kit (Qiagen, Netherlands) according to manufacturer's instruction. RNA concentration and purity was assessed using a NanoDrop system. Next, first strand cDNA synthesis was performed using the High-Capacity-RNA-to-cDNA Kit (Applied Biosystems, USA), following the manufacturer's instruction.

Quantitative real-time TaqMan PCR was then performed using primers for the following genes: Tagln, Cnn1, Myocd, Itga8, Col3A1, Cald1, S100A1, Kdr, Vcan, Hif1a, Acta2, Smtn and Mmp2 (detailed primer description in Suppl. Table 4). qPCR was run on a QuantStudio5 Cyclor (Applied Biosystems, USA), using 384 well plates. Gene expression was normalized to Rplp0 and GAPDH, and quantified with the  $2^{-\Delta\Delta C_t}$  method.

For Myh11, SYBR Green based quantitative real-time PCR was performed. PCR was run on a QuantStudio5 Cyclor, using 384 well plates. Gene expression was normalized to Rplp0 and GAPDH and quantified with the  $2^{-\Delta\Delta C_t}$  method.

#### Cytoskeleton staining (integrity) of primary human cells:

Human primary SMCs isolated AAA biopsies (from three different patients) were stained by immunofluorescence for the typical SMC markers (SM22-SMA-CNN1) as well as for F-actin with phalloidin and compared to commercially available SMC (from healthy donor). Patient-derived SMCs show a similar expression pattern for the utilised markers, to the control SMCs. Protein lysates from three different patient-derived cells were also analysed for the presence of SM22 protein by western blot.

#### Human tissue biobank:

Human aortic aneurysm samples and control aortic wall samples (non-aneurysmatic) were taken from the Munich Vascular Biobank described previously upon patients'

informed consent.(4) The biobank is approved by the local Hospital Ethics Committee (2799/10, Ethikkommission der Fakultät für Medizin der Technischen Universität München, Munich, Germany) and in accordance with the Declaration of Helsinki. Briefly, AAA samples were acquired during open repair from the left anterior wall of the aneurysm, control, non-aneurysmatic samples, and included donor patients from kidney transplants and samples from PAOD procedures - all from the infrarenal abdominal aorta. Samples were divided for, both, formalin-fixation and paraffin embedding, and snap frozen in liquid nitrogen until further use.

#### Immunohistochemistry human tissue:

2 $\mu$ m sections of paraffin-embedded human aortic samples were mounted on SuperFrost slides (Thermo Fisher Scientific, Waltham, MA, USA) for HE and EvG stains. For IHC, sections were stained with different target antibodies (details in Suppl. Table 3), following the protocol described previously for minipig sections. Slides (including immunohistochemistry) were scanned with an Aperio AT2 (Leica, Wetzlar, Germany), and images were taken with the Aperio ImageScope software (Leica).

#### Human immunofluorescence (IF) double staining:

4 $\mu$ m sections of paraffin-embedded human aortic samples were mounted on pre-coated SuperFrost Plus slides. Antigen retrieval and blocking of peroxidase activity was performed as described previously for IHC. In addition, slides were blocked with 5% horse serum for 30 min and all antibodies were diluted in 5% horse serum. Two primary and appropriate secondary antibodies (Suppl. Table IV) were added subsequently to the slides, with the primary antibody of interest (MYH11) being incubated overnight at 4°C, and the following primary antibody for co-staining ( $\alpha$ SMA) for 1h at room temperature. Secondary antibodies were incubated for 1h each. Auto-fluorescence quenching, counterstaining, and imaging were performed as described in the pig double IF section.

#### Human tissue RNA extraction and qPCR:

Tissues were cut in ~50mg pieces on dry ice. Tissue was homogenized in 700 $\mu$ l Qiazol lysis reagent and total RNA was isolated using the miRNeasy Mini Kit (Qiagen, Netherlands) according to manufacturer's instruction. RNA concentration and purity were assessed using the NanoDrop system described above. RIN number was assessed using the RNA Screen Tape (Agilent, USA) in the Agilent TapeStation 4200. Next, first strand cDNA synthesis was performed using the High-Capacity-RNA-to-cDNA Kit (Applied Biosystems, USA), following the manufacturer's instruction.

Quantitative real-time TaqMan PCR was then performed using primers for the following genes: Tagln, Cnn1, Myocd, Itga8, Col3A1, Cald1, S100A1, Kdr, Vcan, Hif1a, Acta2, Smtn and Mmp2 (Suppl. Table 4). qPCR was run on a QuantStudio5 Cyclor (Applied Biosystems, USA), using 384 well plates. Gene expression was normalized to Rplp0 and Gapdh, and quantified with the 2 <sup>$\Delta\Delta$ Ct</sup> method.

For Myh11, SYBR Green based quantitative real-time PCR was performed. PCR was run on a QuantStudio5 Cyclor using 384 well plates. Gene expression was normalized to Rplp0 and Gapdh and quantified with the  $2^{-\Delta\Delta Ct}$  method.

*Protein isolation and Western Blot:*

*Cells:* Cells were placed in 75cm<sup>2</sup> flasks and treated with 0.1 $\mu$ M lenvatinib in OptiMEM (Thermo Fisher, USA, Lenvatinib-treatment) or 0.1% DMSO in OptiMEM (control-treatment) for 6 and 48h. Cells were washed with ice-cold PBS and harvested with 750 $\mu$ l freshly prepared complete RIPA Buffer (RIPA Lysis and Extraction Buffer, Thermo Fisher, USA) containing Phosphatase Inhibitor Cocktail 2 and 3 (Sigma Aldrich, USA) and Halt Protease Inhibitor Cocktail (ThermoFisher). After homogenization with a pestil and centrifugation for 20 min (14.000rpm at 4°C), the supernatant was frozen down at -80°C in aliquots of total protein lysate. Total protein concentration was measured using the Pierce BCA Protein Assay Kit (Thermo Fisher), following the manufacturer's instruction.

*Western Blot for signaling cascade:* 10 $\mu$ g of protein from each sample was denatured and reduced at 70°C for 10min, then separated in a Bolt 4-12% Bis-Tris Plus Gel (Thermo Fisher) and transferred onto Trans-Blot Turbo Mini-Size LF-PVDF Membranes (BioRad, USA). The blots were blocked with 5% BSA in Tris-buffered saline+0.1% Tween-20 for 1h, followed by overnight incubation with the primary antibody against the un-phosphorylated Kinase in TBS-T+5%BSA. After washing with TBS-T, blots were incubated with anti-mouse and rabbit HRP (horseradish peroxidase)-conjugated secondary antibody and visualized using Enhanced Chemiluminescence (Pierce Fast Western Blot Kit ECL Substrate, Thermo Fisher, USA) in the Intas ECL Chemocam Imager (Intas, Germany) using the Intas ChemoStar Imager Software (Intas, Germany). Blots were stripped using Restore Plus Western Blot Stripping Buffer (Thermo Fisher) and incubated overnight with the primary antibody against the phosphorylated Kinase in TBS-T+5%BSA. After washing with TBS-T, blots were again incubated with anti-mouse and rabbit HRP (horseradish peroxidase)-conjugated secondary antibody and visualized using Enhanced Chemiluminescence (Pierce Fast Western Blot Kit ECL Substrate, Thermo Fisher, USA) in the Intas ECL Chemocam Imager (Intas, Germany), using the Intas ChemoStar Imager Software (Intas, Germany). The blots were quantified using Fiji ImageJ Software.

*Western Blot for human MYH11:* 10 $\mu$ g of protein of each sample was denatured and reduced at 70°C for 10min, then separated in a NuPage 3-8% Tris Acetate-Gel and transferred onto Trans-Blot Turbo Mini-Size LF-PVDF Membranes (BioRad, USA). The blots were blocked with 5% BSA in Tris-buffered saline+0.1%Tween-20 for 1h, followed by overnight incubation with the primary Rabbit Anti-smooth muscle Myosin heavy chain 11 antibody (ab53219, Abcam, United Kingdom) in TBS-T + 5% BSA. After washing with TBS-T, blots were incubated with anti-mouse and rabbit HRP (horseradish peroxidase)-conjugated secondary antibody and visualized using Enhanced Chemiluminescence (Pierce Fast Western Blot Kit ECL Substrate, Thermo Fisher) in the Intas ECL Chemocam Imager (Intas, Germany) using the Intas

ChemoStar Imager Software (Intas, Germany). Blots were stripped using Restore Plus Western Blot Stripping Buffer (Thermo Fisher, USA) and incubated with the loading control primary antibody against  $\beta$ -Actin (A1978-200 $\mu$ l, Sigma Aldrich, USA) in TBS-T+5% BSA for 1h. After washing with TBS-T, blots were again incubated with anti-mouse and rabbit HRP (horseradish peroxidase)-conjugated secondary antibody and visualized using Enhanced Chemiluminescence (Pierce Fast Western Blot Kit ECL Substrate, Thermo Fisher, USA) in the Intas ECL Chemocam Imager (Intas, Germany), using the Intas ChemoStar Imager Software (Intas, Germany).

*Porcine Tissue: Protein-Isolation, Concentration Measurement and WB:* AAA tissue of 25mM Lenvatinib-treated ( $n=4$ ) and control-treated pigs ( $n=3$ ) was cut in ~50mg pieces on dry ice. Tissue was homogenized in 200 $\mu$ l Tissue Extraction Reagent I (Thermo Fisher, USA). After homogenization with the Bio-Gen PRO200 Homogenizer and Multi-Gen 7XL Probes (Pro Scientific, USA), samples were centrifuged for 20 min, 14.000 rpm at 4°C and the supernatant was frozen down at -80°C in aliquots of total protein lysate. Total protein concentration was measured using the Pierce BCA Protein Assay Kit (Thermo Fisher) following the manufacturer's instruction. 15 $\mu$ g of protein of each sample was denatured and reduced at 70°C for 10 minutes, then separated in a NuPage 3-8% Tris Acetate-Gel and transferred onto Trans-Blot Turbo Mini-Size LF-PVDF Membranes (BioRad, USA). The blots were blocked with 5% BSA in Tris-buffered saline+0.1% Tween-20 for 1h, followed by overnight incubation with the primary Rabbit Anti-smooth muscle Myosin heavy chain 11 antibody (ab53219, Abcam, United Kingdom) in TBS-T+5%BSA. After washing with TBS-T, blots were incubated with anti-mouse and rabbit HRP (horseradish peroxidase)-conjugated secondary antibody and visualized using Enhanced Chemiluminescence (Pierce Fast Western Blot Kit ECL Substrate, Thermo Fisher, USA) in the Intas ECL Chemocam Imager (Intas, Germany) using the Intas ChemoStar Imager Software (Intas, Germany). Blots were stripped using Restore Plus Western Blot Stripping Buffer (Thermo Fisher, USA) and incubated with the loading control primary antibody against  $\beta$ -Tubulin in TBS-T+5%BSA for 1h. After washing with TBS-T, blots were again incubated with anti-mouse and rabbit HRP (horseradish peroxidase)-conjugated secondary antibody and visualized using Enhanced Chemiluminescence (Pierce Fast Western Blot Kit ECL Substrate, Thermo Fisher, USA) in the Intas ECL Chemocam Imager (Intas, Germany), using the Intas ChemoStar Imager Software (Intas, Germany).

Statistics and figure composition:

s. material and methods in the main manuscript

**References**

1. Busch A, Chernogubova E, Jin H, Meurer F, Eckstein HH, Kim M, et al. Four Surgical Modifications to the Classic Elastase Perfusion Aneurysm Model Enable Haemodynamic Alterations and Extended Elastase Perfusion. *European journal of vascular and endovascular surgery : the official journal of the European Society for Vascular Surgery*. 2018.



2. Gandhi R, Cawthorne C, Craggs LJL, Wright JD, Domarkas J, He P, et al. Cell proliferation detected using [(18)F]FLT PET/CT as an early marker of abdominal aortic aneurysm. *J Nucl Cardiol*. 2019.
3. Wanhainen A, Verzini F, Van Herzele I, Allaire E, Bown M, Cohnert T, et al. Editor's Choice - European Society for Vascular Surgery (ESVS) 2019 Clinical Practice Guidelines on the Management of Abdominal Aorto-iliac Artery Aneurysms. *European journal of vascular and endovascular surgery : the official journal of the European Society for Vascular Surgery*. 2019;57(1):8-93.
4. Pelisek J, Hegenloh R, Bauer S, Metschl S, Pauli J, Glukha N, et al. Biobanking: Objectives, Requirements, and Future Challenges-Experiences from the Munich Vascular Biobank. *J Clin Med*. 2019;8(2).

Supplement Table I

| Ultrasound measurements |              |             |              |             |               |             |               |             |                |
|-------------------------|--------------|-------------|--------------|-------------|---------------|-------------|---------------|-------------|----------------|
| experiment              | Day 0        |             | Day 7        |             | Day 14        |             | Day 28        |             |                |
|                         | absolu       | norma       | absolu       | norma       | absolut       | norma       | absolu        | normalized  |                |
| stan PPE 1              | 0,58         | 1,00        | 0,93         | 1,59        | 0,85          | 1,47        | 0,98          | 1,69        | stan PPE N=11  |
| stan PPE 2              | 0,55         | 1,00        | 0,90         | 1,64        | 0,86          | 1,56        | 0,89          | 1,61        |                |
| stan PPE 3              | 0,62         | 1,00        | 0,87         | 1,39        | 0,87          | 1,39        | 1,00          | 1,60        |                |
| stan PPE 4              | 0,62         | 1,00        | 0,87         | 1,40        | 0,93          | 1,50        | 1,07          | 1,73        |                |
| stan PPE 5              | 0,56         | 1,00        | 0,76         | 1,36        | 0,83          | 1,48        | 0,93          | 1,66        |                |
| stan PPE 6              | 0,55         | 1,00        | 0,83         | 1,51        | 0,99          | 1,80        | 0,99          | 1,80        |                |
| stan PPE 7              | 0,62         | 1,00        | 0,80         | 1,29        | 1,03          | 1,66        | 1,10          | 1,77        |                |
| stan PPE 8              | 0,60         | 1,00        | 0,79         | 1,32        | 0,95          | 1,59        | 1,03          | 1,71        |                |
| stan PPE 9              | 0,59         | 1,00        | 0,86         | 1,45        | 0,99          | 1,67        | 1,04          | 1,75        |                |
| stan PPE 10             | 0,53         | 1,00        | 0,81         | 1,52        | 0,91          | 1,71        | 0,98          | 1,83        |                |
| stan PPE 11             | 0,61         | 1,00        | 0,87         | 1,43        | 0,93          | 1,53        | 1,17          | 1,93        |                |
|                         | <b>Day 0</b> |             | <b>Day 7</b> |             | <b>Day 14</b> |             | <b>Day 28</b> |             |                |
|                         | absolu       | normaliz    | absolu       | normaliz    | absolut       | normaliz    | absolu        | normaliz    |                |
| mean                    | <b>0,59</b>  | <b>1,00</b> | <b>0,84</b>  | <b>1,45</b> | <b>0,92</b>   | <b>1,58</b> | <b>1,01</b>   | <b>1,73</b> |                |
| standard dev            | 0,03         | 0,00        | 0,05         | 0,10        | 0,06          | 0,12        | 0,08          | 0,09        |                |
| Lenva syst              | 0,58         | 1,00        | 0,85         | 1,45        | 0,89          | 1,53        | 0,86          | 1,48        | Lenva syst N=7 |
| Lenva syst2             | 0,61         | 1,00        | 0,75         | 1,23        | 0,94          | 1,54        | 0,95          | 1,55        |                |
| Lenva syst              | 0,63         | 1,00        | 0,87         | 1,39        | 0,80          | 1,27        | 0,94          | 1,50        |                |
| Lenva syst              | 0,59         | 1,00        | 0,70         | 1,18        | 0,78          | 1,31        | 0,67          | 1,13        |                |
| Lenva syst              | 0,56         | 1,00        | 0,80         | 1,43        | 0,77          | 1,38        | 0,81          | 1,44        |                |
| Lenva syst              | 0,61         | 1,00        | 0,78         | 1,28        | 0,82          | 1,35        | 0,87          | 1,43        |                |
| Lenva syst              | 0,65         | 1,00        | 0,81         | 1,24        | 0,71          | 1,09        | 0,73          | 1,12        |                |
|                         | <b>Day 0</b> |             | <b>Day 7</b> |             | <b>Day 14</b> |             | <b>Day 28</b> |             |                |
|                         | absolu       | normaliz    | absolu       | normaliz    | absolut       | normaliz    | absolu        | normaliz    |                |
| mean                    | <b>0,60</b>  | <b>1,00</b> | <b>0,79</b>  | <b>1,32</b> | <b>0,81</b>   | <b>1,35</b> | <b>0,83</b>   | <b>1,38</b> |                |
| standard dev            | 0,03         | 0,00        | 0,05         | 0,10        | 0,07          | 0,14        | 0,10          | 0,16        |                |
| Sham-Re O               | 0,52         | 1,00        | 0,84         | 1,61        | 0,93          | 1,80        | 1,04          | 2,01        | Sham-Re OP N=3 |
| Sham-Re O               | 0,58         | 1,00        | 0,83         | 1,44        | 0,92          | 1,59        | 0,88          | 1,52        |                |
| Sham-Re O               | 0,49         | 1,00        | 0,76         | 1,55        | 0,82          | 1,66        | 0,89          | 1,80        |                |
|                         | <b>Day 0</b> |             | <b>Day 7</b> |             | <b>Day 14</b> |             | <b>Day 28</b> |             |                |
|                         | absolu       | normaliz    | absolu       | normaliz    | absolut       | normaliz    | absolu        | normaliz    |                |
| mean                    | <b>0,53</b>  | <b>1,00</b> | <b>0,81</b>  | <b>1,53</b> | <b>0,89</b>   | <b>1,68</b> | <b>0,94</b>   | <b>1,78</b> |                |
| standard dev            | 0,03         | 0,00        | 0,03         | 0,07        | 0,05          | 0,09        | 0,08          | 0,20        |                |

|                     |             |             |             |             |             |             |             |             |                        |
|---------------------|-------------|-------------|-------------|-------------|-------------|-------------|-------------|-------------|------------------------|
| Lenva local         | 0,58        | 1,00        | 0,75        | 1,29        | 0,79        | 1,37        | 0,75        | 1,29        | <b>Lenva local N=5</b> |
| Lenva local         | 0,53        | 1,00        | 0,83        | 1,57        |             |             |             |             |                        |
| Lenva local         | 0,61        | 1,00        | 0,88        | 1,45        | 0,78        | 1,28        | 0,90        | 1,48        |                        |
| Lenva local         | 0,63        | 1,00        | 0,83        | 1,33        | 0,79        | 1,26        | 0,89        | 1,41        |                        |
| Lenva local         | 0,47        | 1,00        | 0,78        | 1,66        | 0,88        | 1,87        | 0,75        | 1,60        |                        |
| <b>mean</b>         | <b>0,56</b> | <b>1,00</b> | <b>0,81</b> | <b>1,46</b> | <b>0,81</b> | <b>1,44</b> | <b>0,82</b> | <b>1,45</b> |                        |
| <b>standard dev</b> | <b>0,06</b> | <b>0,00</b> | <b>0,05</b> | <b>0,14</b> | <b>0,04</b> | <b>0,25</b> | <b>0,07</b> | <b>0,11</b> |                        |

### Laboratory Analysis

|                     |             |             |             |             |               |             |
|---------------------|-------------|-------------|-------------|-------------|---------------|-------------|
| stan PPE 4          | 4,4         | 3,4         | 0,1         | 0,9         | 727           | 8,6         |
| stan PPE 5          | 3,6         | 2,9         | 0,1         | 0,6         | 818           | 8,6         |
| stan PPE 6          | 2,3         | 1,7         | 0,1         | 0,5         | 350           | 10,6        |
| stan PPE 7          | 3,9         | 2,9         | 0,1         | 0,9         | 576           | 9,4         |
| <b>mean</b>         | <b>3,55</b> | <b>2,73</b> | <b>0,10</b> | <b>0,73</b> | <b>617,75</b> | <b>9,3</b>  |
| <b>standard dev</b> | <b>0,78</b> | <b>0,63</b> | <b>0,00</b> | <b>0,18</b> | <b>177,11</b> | <b>0,82</b> |

#### white cell count

normal range **3.0-15.0 x10<sup>9</sup>/μl**

#### platelets

**140-600 x10<sup>9</sup>/μl**

#### monocytes

**0.3-0.8 x10<sup>9</sup>/μl**

#### hemoglobin

**6.9-11,2mmol/l**

#### granulocytes

**1.2-6.8 x10<sup>9</sup>/μl**

#### lymphocytes

**1.2-3.2 x10<sup>9</sup>/μl**

|                     |             |             |             |             |               |             |
|---------------------|-------------|-------------|-------------|-------------|---------------|-------------|
| Lenva syst          | 6,3         | 4,2         | 0,2         | 1,9         | 637           | 9,6         |
| Lenva syst2         | 4,6         | 3,1         | 0,2         | 1,3         | 937           | 9,2         |
| Lenva syst          | 4,2         | 2,9         | 0,1         | 1,2         | 798           | 9,2         |
| Lenva syst          | 8,8         | 6,2         | 0,3         | 2,3         | 669           | 9,9         |
| Lenva syst          | 4,7         | 3,5         | 0,2         | 1           | 835           | 9,1         |
| Lenva syst          | 4,7         | 3,7         | 0,1         | 0,9         | 855           | 8,8         |
| Lenva syst          | 4,4         | 3,3         | 0,1         | 1           | 788           | 9,5         |
| <b>mean</b>         | <b>5,39</b> | <b>3,84</b> | <b>0,17</b> | <b>1,37</b> | <b>788,43</b> | <b>9,33</b> |
| <b>standard dev</b> | <b>1,53</b> | <b>1,04</b> | <b>0,07</b> | <b>0,49</b> | <b>97,07</b>  | <b>0,34</b> |

## Angotension II model

### diameter absolute

|      |       | <u>baseline</u> | d3    | d7    | d14   | d21   | d27          |
|------|-------|-----------------|-------|-------|-------|-------|--------------|
| 2060 | PBS   | 1,087           | 1,396 | 2,010 | 2,224 | 2,447 | <u>2,444</u> |
| 2061 | PBS   | 1,072           | 1,428 | 1,183 | 1,409 | 1,900 | <u>1,446</u> |
| 2053 | PBS   | 1,240           | 1,517 | 1,663 | 1,657 | 1,790 | <u>1,688</u> |
| 2067 | PBS   | 1,190           | 1,821 | 2,373 | 2,792 | 2,580 | <u>2,610</u> |
| 2068 | PBS   | 1,215           | 1,388 | 2,007 | 2,086 | 2,049 | <u>2,355</u> |
|      |       |                 |       |       |       |       |              |
| 2054 | Lenva | 1,252           | 1,339 | 2,080 | 2,267 | 2,079 | <u>3,126</u> |
| 2058 | Lenva | 1,149           | 1,559 | 1,530 | 1,555 | 1,907 | <u>1,760</u> |
| 2062 | Lenva | 1,147           | 1,519 | 1,579 | 1,415 | 1,597 | <u>1,463</u> |
| 2063 | Lenva | 1,037           | 1,685 | 1,443 | 1,891 | 1,774 | <u>1,847</u> |
| 2065 | Lenva | 1,079           | 1,453 | 1,383 | 1,544 | 1,327 | <u>2,139</u> |
| 2056 | Lenva | 1,063           | 1,294 | 1,426 | 1,366 | 1,556 | <u>1,426</u> |

### Volume abs

|      |       |       |       |       |       |       |              |
|------|-------|-------|-------|-------|-------|-------|--------------|
| 2060 | PBS   | 7,97  | 14,25 | 25,63 | 29,82 | 32,83 | 32,93        |
| 2061 | PBS   | 8,42  | 11,18 | 9,66  | 12,36 | 15,79 | 10,36        |
| 2053 | PBS   | 10,41 | 14,84 | 20,05 | 16,95 | 14,73 | 17,42        |
| 2067 | PBS   | 9,06  | 19,03 | 33,41 | 28,72 | 33,09 | 29,69        |
| 2068 | PBS   | 7,70  | 12,12 | 28,12 | 28,56 | 32,75 | 33,81        |
|      |       |       |       |       |       |       |              |
| 2054 | Lenva | 10,54 | 12,00 | 25,78 | 29,54 | 26,08 | <u>49,04</u> |
| 2058 | Lenva | 8,08  | 14,11 | 19,18 | 17,73 | 19,87 | <u>17,06</u> |
| 2062 | Lenva | 8,61  | 16,20 | 15,75 | 15,18 | 13,61 | <u>13,37</u> |
| 2063 | Lenva | 7,04  | 15,65 | 16,16 | 18,23 | 19,10 | <u>19,98</u> |
| 2065 | Lenva | 7,86  | 13,86 | 15,04 | 14,26 | 13,67 | <u>25,97</u> |
| 2056 | Lenva | 8,64  | 11,03 | 16,06 | 17,84 | 16,02 | <u>14,35</u> |

# Local Mouse Data

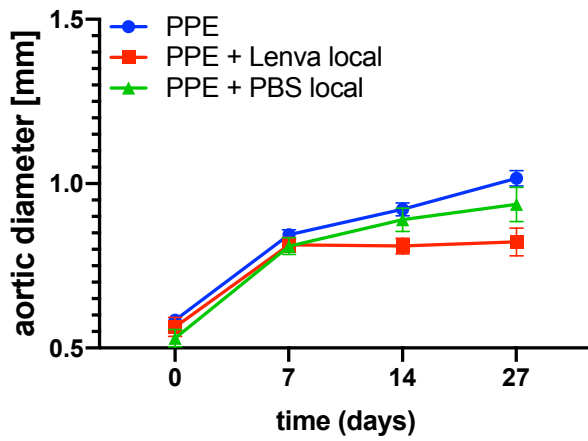

|    | Significant? | P value  | Mean of PPE | Mean of PPE + Lenva local | Difference | SE of difference | t ratio | df    | Adjusted P Value |
|----|--------------|----------|-------------|---------------------------|------------|------------------|---------|-------|------------------|
| 0  | No           | 0.403659 | 0.5845      | 0.5640                    | 0.02055    | 0.02386          | 0.8612  | 14.00 | 0.487498         |
| 7  | No           | 0.284107 | 0.8445      | 0.8140                    | 0.03055    | 0.02742          | 1.114   | 14.00 | 0.487498         |
| 14 | Yes          | 0.008020 | 0.9218      | 0.8100                    | 0.1118     | 0.03576          | 3.127   | 13.00 | 0.023868         |
| 27 | Yes          | 0.001095 | 1.016       | 0.8225                    | 0.1939     | 0.04646          | 4.172   | 13.00 | 0.004372         |

|    | Significant? | P value  | Mean of PPE | Mean of PPE + PBS local | Difference | SE of difference | t ratio | df    | Adjusted P Value |
|----|--------------|----------|-------------|-------------------------|------------|------------------|---------|-------|------------------|
| 0  | No           | 0.034843 | 0.5845      | 0.5300                  | 0.05455    | 0.02293          | 2.379   | 12.00 | 0.132254         |
| 7  | No           | 0.308702 | 0.8445      | 0.8100                  | 0.03455    | 0.03250          | 1.063   | 12.00 | 0.522107         |
| 14 | No           | 0.461861 | 0.9218      | 0.8900                  | 0.03182    | 0.04186          | 0.7601  | 12.00 | 0.522107         |
| 27 | No           | 0.153341 | 1.016       | 0.9367                  | 0.07970    | 0.05228          | 1.524   | 12.00 | 0.393088         |

Data shown as Mean +/- SEM. Multiple t-test (1 per row) with *post hoc* Holm-Sidak correction for multiple comparisons. n = 11 (PPE) , 5 (Lenva local) or 3 (PBS local)

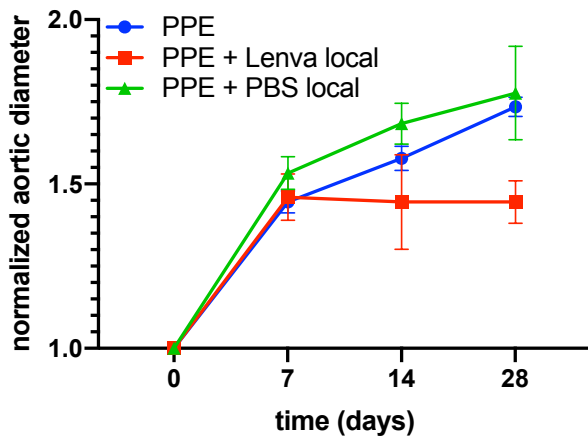

|    | Significant? | P value  | Mean of PPE | Mean of PPE + Lenva local | Difference | SE of difference | t ratio | df    | Adjusted P Value |
|----|--------------|----------|-------------|---------------------------|------------|------------------|---------|-------|------------------|
| 0  |              |          | 1.000       | 1.000                     | 0.000      | 0.000            |         |       |                  |
| 7  | No           | 0.832420 | 1.445       | 1.460                     | -0.01455   | 0.06747          | 0.2156  | 14.00 | 0.832420         |
| 14 | No           | 0.213376 | 1.578       | 1.445                     | 0.1332     | 0.1018           | 1.308   | 13.00 | 0.381222         |
| 28 | Yes          | 0.000423 | 1.735       | 1.445                     | 0.2895     | 0.06174          | 4.690   | 13.00 | 0.001269         |

|    | Significant? | P value  | Mean of PPE | Mean of PPE + PBS local | Difference | SE of difference | t ratio | df    | Adjusted P Value |
|----|--------------|----------|-------------|-------------------------|------------|------------------|---------|-------|------------------|
| 0  |              |          | 1.000       | 1.000                   | 0.000      | 0.000            |         |       |                  |
| 7  | No           | 0.228973 | 1.445       | 1.533                   | -0.08788   | 0.06932          | 1.268   | 12.00 | 0.488461         |
| 14 | No           | 0.200240 | 1.578       | 1.683                   | -0.1052    | 0.07758          | 1.355   | 12.00 | 0.488461         |
| 28 | No           | 0.638269 | 1.735       | 1.777                   | -0.04212   | 0.08733          | 0.4823  | 12.00 | 0.638269         |

Data shown as Mean +/- SEM. Multiple t-test (1 per row) with *post hoc* Holm-Sidak correction for multiple comparisons. n = 11 (PPE) , 5 (Lenva local) or 3 (PBS local)

# Mouse Data

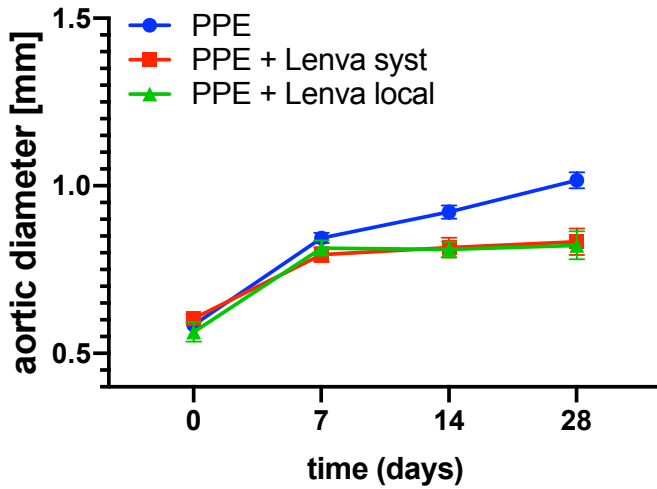

|    | Significant? | P value  | Mean of PPE | Mean of PPE + Lenva syst | Difference | SE of difference | t ratio | df    | Adjusted P Value |
|----|--------------|----------|-------------|--------------------------|------------|------------------|---------|-------|------------------|
| 0  | No           | 0.218325 | 0.5845      | 0.6043                   | -0.01974   | 0.01541          | 1.281   | 16.00 | 0.218325         |
| 7  | No           | 0.071058 | 0.8445      | 0.7943                   | 0.05026    | 0.02599          | 1.934   | 16.00 | 0.137067         |
| 14 | Yes          | 0.006269 | 0.9218      | 0.8157                   | 0.1061     | 0.03374          | 3.144   | 16.00 | 0.018689         |
| 28 | Yes          | 0.000582 | 1.016       | 0.8329                   | 0.1835     | 0.04294          | 4.274   | 16.00 | 0.002325         |

  

|    | Significant? | P value  | Mean of PPE | Mean of PPE + Lenva local | Difference | SE of difference | t ratio | df    | Adjusted P Value |
|----|--------------|----------|-------------|---------------------------|------------|------------------|---------|-------|------------------|
| 0  | No           | 0.403659 | 0.5845      | 0.5640                    | 0.02055    | 0.02386          | 0.8612  | 14.00 | 0.487498         |
| 7  | No           | 0.284107 | 0.8445      | 0.8140                    | 0.03055    | 0.02742          | 1.114   | 14.00 | 0.487498         |
| 14 | Yes          | 0.008020 | 0.9218      | 0.8100                    | 0.1118     | 0.03576          | 3.127   | 13.00 | 0.023868         |
| 28 | Yes          | 0.001095 | 1.016       | 0.8225                    | 0.1939     | 0.04646          | 4.172   | 13.00 | 0.004372         |

Data shown as Mean +/- SEM. Multiple t-test (1 per row) with *post hoc* Holm-Sidak correction for multiple comparisons. n = 11 (PPE) , 7 (Lenva systemic) or 5 (Lenva local)

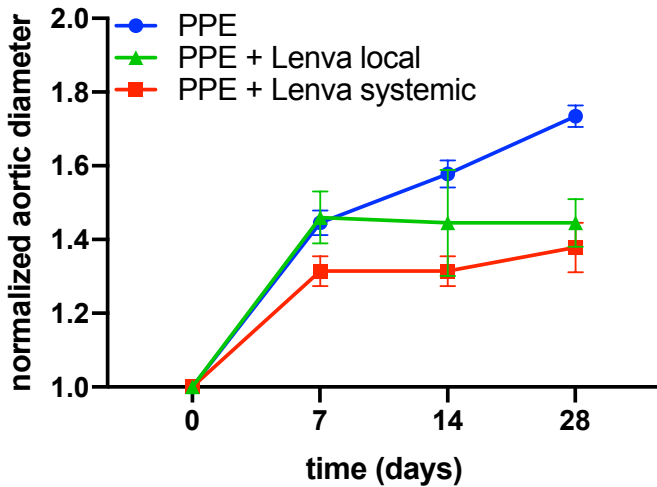

|    | Significant? | P value  | Mean of PPE | Mean of PPE + Lenva syst | Difference | SE of difference | t ratio | df    | Adjusted P Value |
|----|--------------|----------|-------------|--------------------------|------------|------------------|---------|-------|------------------|
| 0  |              |          | 1.000       | 1.000                    | 0.000      | 0.000            |         |       |                  |
| 7  | Yes          | 0.024318 | 1.445       | 1.314                    | 0.1312     | 0.05275          | 2.487   | 16.00 | 0.024318         |
| 14 | Yes          | 0.000246 | 1.578       | 1.314                    | 0.2639     | 0.05627          | 4.690   | 16.00 | 0.000492         |
| 28 | Yes          | 0.000046 | 1.735       | 1.379                    | 0.3560     | 0.06446          | 5.523   | 16.00 | 0.000139         |

  

|    | Significant? | P value  | Mean of PPE | Mean of PPE + Lenva local | Difference | SE of difference | t ratio | df    | Adjusted P Value |
|----|--------------|----------|-------------|---------------------------|------------|------------------|---------|-------|------------------|
| 0  |              |          | 1.000       | 1.000                     | 0.000      | 0.000            |         |       |                  |
| 7  | No           | 0.832420 | 1.445       | 1.460                     | -0.01455   | 0.06747          | 0.2156  | 14.00 | 0.832420         |
| 14 | No           | 0.213376 | 1.578       | 1.445                     | 0.1332     | 0.1018           | 1.308   | 13.00 | 0.381222         |
| 28 | Yes          | 0.000423 | 1.735       | 1.445                     | 0.2895     | 0.06174          | 4.690   | 13.00 | 0.001269         |

Data shown as Mean +/- SEM. Multiple t-test (1 per row) with *post hoc* Holm-Sidak correction for multiple comparisons. n = 11 (PPE) , 7 (Lenva systemic) or 5 (Lenva local)

# AngII + Gavage Data - Diameter

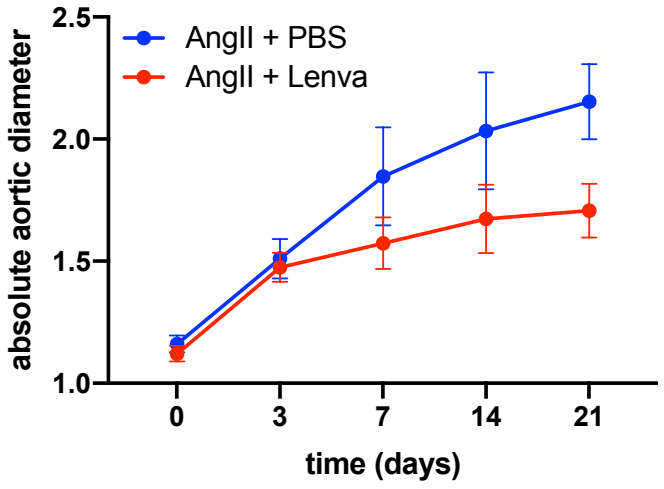

|    | Below threshold? | P value  | Mean of AngII + PBS | Mean of AngII + Lenva | Difference | SE of difference | t ratio | df    | Adjusted P Value |
|----|------------------|----------|---------------------|-----------------------|------------|------------------|---------|-------|------------------|
| 0  | No               | 0.420840 | 1.161               | 1.121                 | 0.03963    | 0.04699          | 0.8434  | 9.000 | 0.664573         |
| 3  | No               | 0.728246 | 1.510               | 1.475                 | 0.03517    | 0.09810          | 0.3585  | 9.000 | 0.728246         |
| 7  | No               | 0.235388 | 1.847               | 1.574                 | 0.2737     | 0.2152           | 1.272   | 9.000 | 0.607306         |
| 14 | No               | 0.208386 | 2.034               | 1.673                 | 0.3606     | 0.2661           | 1.355   | 9.000 | 0.607306         |
| 21 | No               | 0.038779 | 2.153               | 1.707                 | 0.4465     | 0.1847           | 2.417   | 9.000 | 0.179429         |

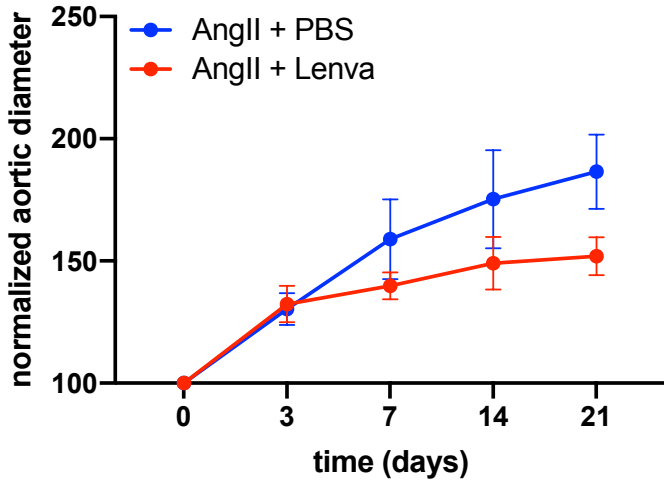

|    | Below threshold? | P value  | Mean of AngII + PBS | Mean of AngII + Lenva | Difference | SE of difference | t ratio | df    | Adjusted P Value |
|----|------------------|----------|---------------------|-----------------------|------------|------------------|---------|-------|------------------|
| 0  |                  |          | 100.0               | 100.0                 | 0.000      | 0.000            |         |       |                  |
| 3  | No               | 0.843013 | 130.3               | 132.4                 | -2.064     | 10.13            | 0.2038  | 9.000 | 0.843013         |
| 7  | No               | 0.262617 | 158.9               | 139.8                 | 19.07      | 15.96            | 1.195   | 9.000 | 0.591034         |
| 14 | No               | 0.257729 | 175.3               | 149.1                 | 26.19      | 21.68            | 1.208   | 9.000 | 0.591034         |
| 21 | No               | 0.060732 | 186.5               | 152.0                 | 34.55      | 16.12            | 2.143   | 9.000 | 0.221680         |

# AngII + Gavage Data - Volume

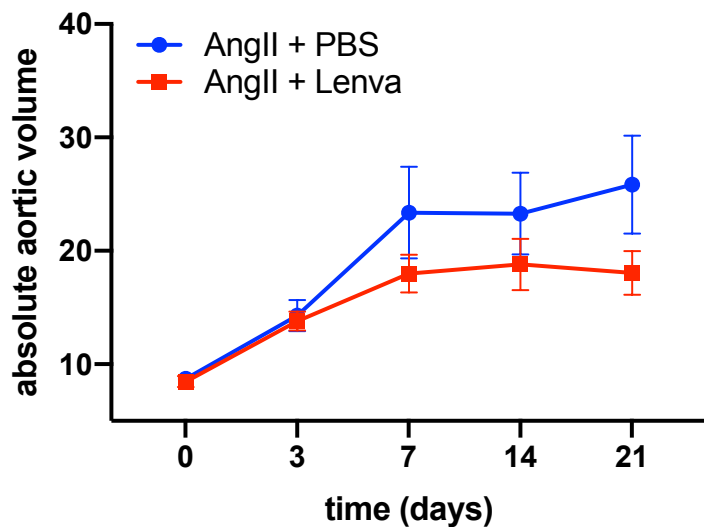

|    | Below threshold? | P value  | Mean of AngII + PBS | Mean of AngII + Lenva | Difference | SE of difference | t ratio | df    | Adjusted P Value |
|----|------------------|----------|---------------------|-----------------------|------------|------------------|---------|-------|------------------|
| 0  | No               | 0.723776 | 8.712               | 8.462                 | 0.2503     | 0.6865           | 0.3647  | 9.000 | 0.923700         |
| 3  | No               | 0.762740 | 14.28               | 13.81                 | 0.4757     | 1.529            | 0.3112  | 9.000 | 0.923700         |
| 7  | No               | 0.220849 | 23.37               | 18.00                 | 5.379      | 4.089            | 1.316   | 9.000 | 0.631458         |
| 14 | No               | 0.301495 | 23.28               | 18.80                 | 4.485      | 4.092            | 1.096   | 9.000 | 0.659193         |
| 21 | No               | 0.114185 | 25.84               | 18.06                 | 7.780      | 4.448            | 1.749   | 9.000 | 0.454599         |

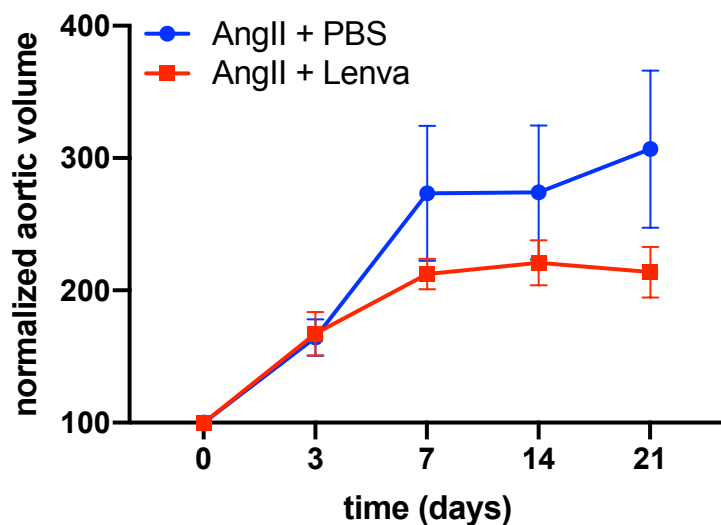

|    | Below threshold? | P value  | Mean of AngII + PBS | Mean of AngII + Lenva | Difference | SE of difference | t ratio | df    | Adjusted P Value |
|----|------------------|----------|---------------------|-----------------------|------------|------------------|---------|-------|------------------|
| 0  |                  |          | 100.0               | 100.0                 | 0.000      | 0.000            |         |       |                  |
| 3  | No               | 0.895642 | 164.4               | 167.3                 | -2.955     | 21.90            | 0.1349  | 9.000 | 0.895642         |
| 7  | No               | 0.233026 | 273.5               | 212.4                 | 61.05      | 47.75            | 1.279   | 9.000 | 0.548828         |
| 14 | No               | 0.309926 | 274.0               | 220.9                 | 53.10      | 49.35            | 1.076   | 9.000 | 0.548828         |
| 21 | No               | 0.141198 | 306.8               | 213.8                 | 92.99      | 57.65            | 1.613   | 9.000 | 0.456034         |



**For the PPE data analysis, the adjustment was performed for comparisons deemed relevant as per below:**

- D0+7 comparisons – not relevant
- D14+28 comparisons – relevant (PPE vs Lenva syst, PPE vs Lenva local, Lenva local vs Sham reop), not relevant (remaining 3 permutations)
- D14 + D28 vs D7 for each treatment.

Thus, the correction for 3 tests was performed for treatment comparisons and for 2 tests for time.

| Comparison (absolute)           | p-value | Sidak adj-p    |
|---------------------------------|---------|----------------|
| D14 - PPE vs. Lenva syst        | 0.0009  | 0.002697571 ** |
| D14 - PPE vs. Lenva local       | 0.0036  | 0.010761167 ** |
| D14 - Lenva local vs. Sham reop | 0.1075  | 0.289073547    |
| D28 - PPE vs. Lenva syst        | <0.0001 | <0.0001 ***    |
| D28 - PPE vs. Lenva local       | <0.0001 | <0.0001 ***    |
| D28 - Lenva local vs. Sham reop | 0.0207  | 0.0608234      |
| PPE – d14 vs d7                 | 0.0173  | 0.03430071 *   |
| PPE – d28 vs d7                 | 0.0001  | 0.00019999 *** |
| Sham reop – d14 vs d7           | 0.0153  | 0.03036591 *   |
| Sham reop – d28 vs d7           | 0.0998  | 0.18963996     |
| Lenva syst – d14 vs d7          | 0.5935  | 0.8347578      |
| Lenva syst – d28 vs d7          | 0.3105  | 0.5245898      |
| Lenva local – d14 vs d7         | 0.9877  | 0.9998487      |
| Lenva local – d28 vs d7         | 0.5974  | 0.8379132      |

Table

Results table for ANOVA

| Source of Variation | % of total variation | P value | SS     | DF | MS       | F (DFn, DFd)             |
|---------------------|----------------------|---------|--------|----|----------|--------------------------|
| Time x Treatment    | 5.596                | 0.0001  | 0.1308 | 9  | 0.01453  | F (9, 63) = 4.614        |
| Time                | 54.4                 | <0.0001 | 1.271  | 3  | 0.4238   | F (2.552, 53.58) = 134.5 |
| Treatment           | 6.572                | 0.0017  | 0.1536 | 3  | 0.05120  | F (3, 21) = 7.181        |
| Subject             | 6.405                | 0.0067  | 0.1497 | 21 | 0.007129 | F (21, 63) = 2.263       |
| Residual            |                      |         | 0.1985 | 63 | 0.003150 |                          |

### Assumption of normality:

#### Groupwise residual plots

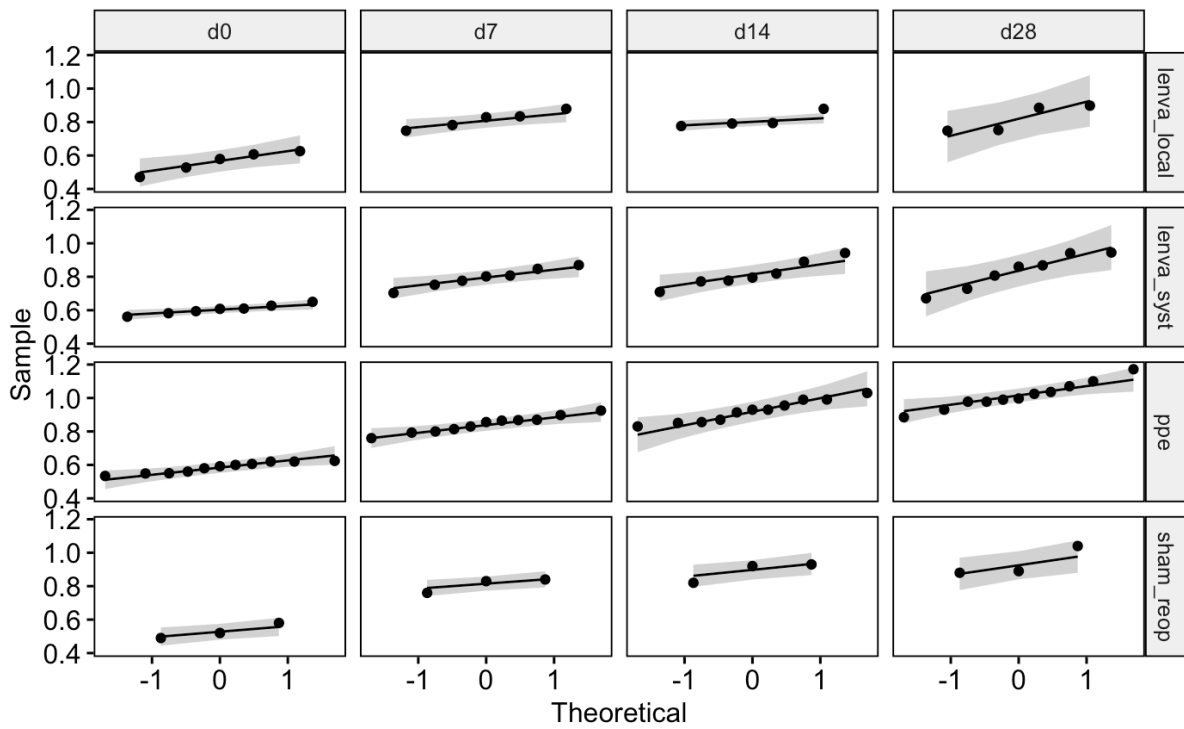

Shapiro-Wilk's test **NS** for all above.

#### Overall residual plot

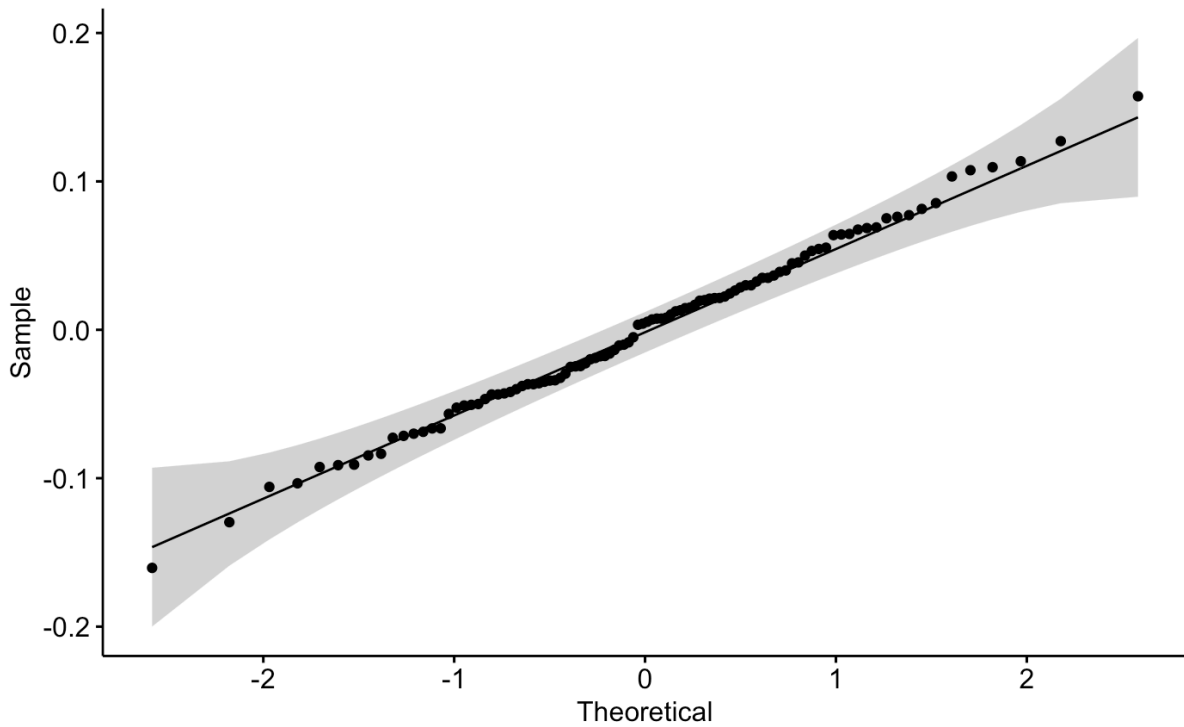

Shapiro-Wilk's test for all datapoints – NS ( $p=0.997$ )

**Assumption of homogeneity of variance:**

Levene's test – NS:

| <b>timepoint</b> | <b>df1</b> | <b>df2</b> | <b>statistic</b> | <b>p</b> |
|------------------|------------|------------|------------------|----------|
| d0               | 3          | 22         | 1.133            | 0.3574   |
| d7               | 3          | 22         | 0.1569           | 0.9241   |
| d14              | 3          | 21         | 0.483            | 0.6977   |
| d28              | 3          | 21         | 0.2249           | 0.878    |
| Overall          | 15         | 86         | 0.9837           | 0.4792   |

Box's M-test for Homogeneity of covariance – NS (p=0.116)

## Supplement Table II: Primer List

| target                                                                                                                                                                                                                    | name                                       | sequence/name        | supplier      |
|---------------------------------------------------------------------------------------------------------------------------------------------------------------------------------------------------------------------------|--------------------------------------------|----------------------|---------------|
| <b>TAGLN</b>                                                                                                                                                                                                              | transgelin                                 | Hs01038777_g1        | Thermo Fisher |
| change and transformation sensitive actin-binding protein; belongs to calponin family; ubiquitously expressed in vascular smooth muscle; early marker of smooth muscle differentiation                                    |                                            |                      |               |
| <b>CNN1</b>                                                                                                                                                                                                               | calponin 1                                 | Hs00959434_m1        | Thermo Fisher |
| an actin filament-associated regulatory protein; role in contractile functions;                                                                                                                                           |                                            |                      |               |
| <b>MYOCD</b>                                                                                                                                                                                                              | myocardin                                  | Hs00538076_m1        | Thermo Fisher |
| nuclear protein, expressed in heart, aorta, and smooth muscle cell-containing tissues; modulates expression of smooth muscle-specific SRF-target genes; crucial role in differentiation of the smooth muscle cell lineage |                                            |                      |               |
| <b>ITGA8</b>                                                                                                                                                                                                              | integrin subunit alpha 8                   | Hs00233321_m1        | Thermo Fisher |
| Integrins are heterodimeric transmembrane receptor proteins that mediate numerous cellular processes; the integrin alpha8beta1 protein thus plays an important role in wound-healing and organogenesis;                   |                                            |                      |               |
| <b>COL3A1</b>                                                                                                                                                                                                             | collagen type III alpha 1 chain            | Hs00943809_m1        | Thermo Fisher |
| fibrillar collagen extensible in connective tissues such as the vascular system; Mutations are associated with Ehlers-Danlos syndrome types IV and with aortic and arterial aneurysms                                     |                                            |                      |               |
| <b>CALD1</b>                                                                                                                                                                                                              | caldesmon 1                                | Hs00921987_m1        | Thermo Fisher |
| calmodulin- and actin-binding protein that plays an essential role in the regulation of smooth muscle and nonmuscle contraction                                                                                           |                                            |                      |               |
| <b>S100A1</b>                                                                                                                                                                                                             | S100 calcium binding protein A1            | Hs00984741_m1        | Thermo Fisher |
| S100 proteins are localized in the cytoplasm and/or nucleus of a wide range of cells and involved in the regulation of a number of cellular processes such as cell cycle progression and differentiation                  |                                            |                      |               |
| <b>KDR</b>                                                                                                                                                                                                                | kinase insert domain receptor              | Hs00911700_m1        | Thermo Fisher |
| VEGF receptor 2 functions as the main mediator of VEGF-induced endothelial proliferation, survival, migration, tubular morphogenesis and sprouting                                                                        |                                            |                      |               |
| <b>RPLP0</b>                                                                                                                                                                                                              | ribosomal protein lateral stalk subunit P0 | HS00420895_gH        | Thermo Fisher |
| housekeeping gene for PCR                                                                                                                                                                                                 |                                            |                      |               |
| <b>VCAN</b>                                                                                                                                                                                                               | versican                                   | HS00171642_M1        | Thermo Fisher |
| aggrecan/versican proteoglycan family; major component of the extracellular matrix; nvolved in cell adhesion, proliferation, proliferation, migration and angiogenesis;                                                   |                                            |                      |               |
| <b>HIF1a</b>                                                                                                                                                                                                              | hypoxia inducible factor 1 subunit alpha   | Hs_00153153_m1       | Thermo Fisher |
| HIF-1 functions as a master regulator of cellular and systemic homeostatic response to hypoxia; essential role in embryonic vascularization, tumor angiogenesis and ischemic disease;                                     |                                            |                      |               |
| <b>ACTA2</b>                                                                                                                                                                                                              | actin alpha 2                              | HS00426835_G1        | Thermo Fisher |
| smooth muscle actin that is involved in vascular contractility;                                                                                                                                                           |                                            |                      |               |
| <b>GAPDH</b>                                                                                                                                                                                                              | glyceraldehyde-3-phosphate dehydrogenase   | HS03929097_G1        | Thermo Fisher |
| housekeeping gene for PCR                                                                                                                                                                                                 |                                            |                      |               |
| <b>SMTN</b>                                                                                                                                                                                                               | smoothelin                                 | Hs01022255_g1        | Thermo Fisher |
| structural protein that is found exclusively in contractile smooth muscle cells;                                                                                                                                          |                                            |                      |               |
| <b>MMP2</b>                                                                                                                                                                                                               | matrix metalloproteinase 2                 | Hs_01548727          | Thermo Fisher |
| zinc-dependent enzymes capable of cleaving components of the extracellular matrix; type IV collagenase;                                                                                                                   |                                            |                      |               |
| <b>GAPDH</b>                                                                                                                                                                                                              | s. above                                   | Hs_GAPDH_1_SG        | Qiagen        |
| housekeeping gene for PCR in pig tissues                                                                                                                                                                                  |                                            |                      |               |
| <b>MYH11_human_fwd</b>                                                                                                                                                                                                    | myosin heavy chain 11                      | TCGAAGAAGAAGCTGCAGGA | Thermo Fisher |
| <b>MYH11_human_rev</b>                                                                                                                                                                                                    |                                            | GTACTGCTGGGTGAGGTTCT | Thermo Fisher |
| smooth muscle myosin; major contractile protein                                                                                                                                                                           |                                            |                      |               |
| <b>RPLP0_human_fwd</b>                                                                                                                                                                                                    | s. above                                   | ATGGCAGCATCTACAACCCT | Thermo Fisher |
| <b>RPLP0_human_rev</b>                                                                                                                                                                                                    |                                            | TTGGGTAGCCAATCTGCAGA | Thermo Fisher |
| housekeeping gene for PCR in pig tissues                                                                                                                                                                                  |                                            |                      |               |

Supplement Table III

| Ultrasound measurements |                 |                 |                 |             |              |             |            |
|-------------------------|-----------------|-----------------|-----------------|-------------|--------------|-------------|------------|
| experimer sex           | Day 0           | Day 7           | Day 28          |             |              |             |            |
|                         | absolut normali | absolut normali | absolut normali |             |              |             |            |
|                         |                 |                 |                 |             |              |             | <b>N=7</b> |
| stan PPE male           | 8,59            | 1               |                 |             | 17,19        | 2,00        |            |
| stan PPE female         | 6,63            | 1               | 9,50            | 1,43        | 12,70        | 1,92        |            |
| stan PPE female         | 5,60            | 1               | 8,20            | 1,46        | 8,60         | 1,54        |            |
| stan PPE male           | 6,80            | 1               | 8,60            | 1,26        | 10,60        | 1,56        |            |
| stan PPE female         | 6,63            | 1               | 9,50            | 1,43        | 10,40        | 1,57        |            |
| stan PPE female         | 6,40            | 1               | 7,60            | 1,19        | 9,60         | 1,50        |            |
| stan PPE male           | 7,20            | 1               | 8,60            | 1,19        | 12,00        | 1,67        |            |
| mean                    | <b>7,56</b>     | <b>1</b>        | <b>9,48</b>     | <b>1,21</b> | <b>11,78</b> | <b>1,56</b> |            |
| standard dev            | 1,34            | 0               | 1,07            | 0,15        | 2,40         | 0,21        |            |

|                |      |   |       |      |      |      |            |
|----------------|------|---|-------|------|------|------|------------|
| Lenva 1 male   | 7,10 | 1 | 10,00 | 1,41 | 9,70 | 1,37 | <b>N=4</b> |
| Lenva 2 female | 8,00 | 1 | 10,80 | 1,35 | 9,70 | 1,21 |            |
| Lenva 3 female | 8,50 | 1 | 10,50 | 1,24 | 9,90 | 1,16 |            |
| Lenva 4 male   | 8,10 | 1 | 10,00 | 1,23 | 9,40 | 1,16 |            |
| mean           | 7,79 | 1 | 10,68 | 1,38 | 9,68 | 1,23 |            |
| standard dev   | 0,56 | 0 | 0,89  | 0,13 | 0,18 | 0,08 |            |

|                |      |   |       |      |       |      |            |
|----------------|------|---|-------|------|-------|------|------------|
| DMSO 9 female  | 7,70 | 1 | 11,00 | 1,43 | 11,30 | 1,47 | <b>N=3</b> |
| DMSO 11 female | 7,90 | 1 | 12,20 | 1,54 | 10,60 | 1,34 |            |
| DMSO 12 female | 8,10 | 1 | 10,40 | 1,28 | 10,80 | 1,33 |            |
| mean           | 7,79 | 1 | 10,68 | 1,38 | 10,90 | 1,38 |            |
| standard dev   | 0,56 | 0 | 0,89  | 0,13 | 0,29  | 0,06 |            |

|              |             |             |             |             |              |             |            |
|--------------|-------------|-------------|-------------|-------------|--------------|-------------|------------|
| wt male      | 8,2         | 1           | 9,8         | 1,195       | 11,6         | 1,415       | <b>N=3</b> |
| wt male      | 7,2         | 1           | 8,6         | 1,194       | 12           | 1,667       |            |
| wt female    | 7           | 1           | 9,3         | 1,329       | 10,1         | 1,443       |            |
| mean         | <b>7,47</b> | <b>1,00</b> | <b>9,23</b> | <b>1,24</b> | <b>11,23</b> | <b>1,51</b> |            |
| standard dev | <b>0,52</b> | <b>0,00</b> | <b>0,49</b> | <b>0,06</b> | <b>0,82</b>  | <b>0,11</b> |            |

| experimenter sex | Day 0       |             | Day 7       |             | Day 28       |             |
|------------------|-------------|-------------|-------------|-------------|--------------|-------------|
|                  | absolut     | normali     | absolut     | normali     | absolut      | normalized  |
| stan PPE male    | 8,59        | 1           |             |             | 17,19        | 2,00        |
| stan PPE female  | 6,63        | 1           | 9,50        | 1,43        | 12,70        | 1,92        |
| stan PPE female  | 5,60        | 1           | 8,20        | 1,46        | 8,60         | 1,54        |
| stan PPE male    | 6,80        | 1           | 8,60        | 1,26        | 10,60        | 1,56        |
| stan PPE female  | 6,63        | 1           | 9,50        | 1,43        | 10,40        | 1,57        |
| stan PPE female  | 6,40        | 1           | 7,60        | 1,19        | 9,60         | 1,50        |
| stan PPE male    | 7,20        | 1           | 8,60        | 1,19        | 12,00        | 1,67        |
| mean male        | <b>7,53</b> | <b>1,00</b> | <b>8,60</b> | <b>1,23</b> | <b>13,26</b> | <b>1,74</b> |
| standard dev     | 0,77        | 0,00        | 0,00        | 0,04        | 2,83         | 0,19        |
| mean female      | <b>6,32</b> | <b>1,00</b> | <b>8,70</b> | <b>1,38</b> | <b>10,33</b> | <b>1,63</b> |
| standard dev     | 0,42        | 0,00        | 0,83        | 0,11        | 1,51         | 0,17        |

| Laboratory analysis           |            |            |            |            |           |            |            |
|-------------------------------|------------|------------|------------|------------|-----------|------------|------------|
| Animal treatment              | Day 0      |            |            |            |           |            |            |
|                               | 1<br>Lenva | 2<br>Lenva | 3<br>Lenva | 4<br>Lenva | 9<br>DMSO | 11<br>DMSO | 12<br>DMSO |
| <b>Blood cou normal range</b> |            |            |            |            |           |            |            |
| WBC (G/L) 11,0-22,0           | 6,7        | 7,7        | 5,9        | 6,7        | 15        | 7,2        | 8          |
| RBC (T/L) 5,8-6,1             | 5,89       | 5,11       | 6,3        | 5,89       | 4,76      | 6,18       | 5,57       |
| HGB (g/L) 120-160             | 123        | 105        | 133        | 123        | 106       | 135        | 117        |
| HCT (L/L) 0,36-0,50           | 0,38       | 0,32       | 0,38       | 0,38       | 0,33      | 0,42       | 0,36       |
| MCV (fL) 50-65                | 64,7       | 63,1       | 60,7       | 64,7       | 68,9      | 67,5       | 65,2       |
| MCH (pg) 17-21                | 20,9       | 20,5       | 21,1       | 20,9       | 22,3      | 21,8       | 21         |
| MCHC (g/c 30-35               | 32,3       | 32,6       | 34,8       | 32,3       | 32,3      | 32,4       | 32,2       |
| PLT (G/L) 220-620             | 334        | 370        | 289        | 334        | 301       | 202        | 156        |
| <b>Liver</b>                  |            |            |            |            |           |            |            |
| alcalic phc < 156             | 56         | 78         | 48         | 56         | 73        | 46         | 114        |
| AST (U/L) < 59                | 32         | 67         | 29         | 32         | 29        | 31         | 22         |
| ALT (U/L) < 68                | 31         | 56         | 31         | 31         | 20        | 43         | 31         |
| γ-GT < 54                     | 71         | 69         | 76         | 71         | 55        | 58         | 65         |
| GLDH (U/L -6,4                | < 2,0      | 5,4        | < 2,0      | < 2,0      | < 2,0     | < 2,0      | < 2,2      |
| Bilirubin (μ < 4,3            | 6,84       | 3,42       | 3,42       | 6,84       | 11,97     | 5,13       | 8,55       |
| CK (U/L) < 4000               | 390        | 375        | 410        | 390        | 361       | 361        | 177        |
| <b>Kidney</b>                 |            |            |            |            |           |            |            |
| creatinine < 160              | 147,6      | 116,7      | 101,7      | 147,6      | 157,4     | 123,8      | 115,8      |
| urea (mmol 2,5-6,7            | 4,00       | 4,66       | 2,33       | 4          | 9,49      | 4,66       | 2,83       |
| sodium (nr 135-150            | 144        | 142        | 139        | 144        | 144       | 140        | 141        |
| potassium 4,2-5,6             | 3,8        | 3,9        | 4,3        | 3,8        | 3,1       | 4,1        | 4          |
| Calcium(nr 1,80-2,90          | 2,49       | 2,4        | 2,44       | 2,49       | 2,52      | 2,52       | 2,52       |
| Magnesium 0,50-1,30           | 0,75       | 0,84       | 0,79       | 0,75       | 0,88      | 0,78       | 0,76       |
| chloride (r 102-106           | 101        | 101        | 101        | 101        | 99        | 99         | 99         |
| Phosphat 1,90-3,20            | 1,94       | 1,97       | 1,86       | 1,94       | 2,05      | 2,15       | 2,04       |
| <b>other</b>                  |            |            |            |            |           |            |            |
| total iron (> 18              | 28,7       | 14         | 19,9       | 28,7       | 31,2      | 29,6       | 20,2       |
| glucose (nr 4,05-6,60         | 10,38      | 7,16       | 10,16      | 10,38      | 5         | 9,99       | 9,32       |
| Albumin(g 28-40               | 33,9       | 30,2       | 33,5       | 33,9       | 36,6      | 32,9       | 33,4       |
| total prote 65-85             | 79         | 72         | 74         | 79         | 78        | 80         | 80         |

| Day 7 |       |       |       |       |       |       |
|-------|-------|-------|-------|-------|-------|-------|
| 1     | 2     | 3     | 4     | 9     | 11    | 12    |
| Lenva | Lenva | Lenva | Lenva | DMSO  | DMSO  | DMSO  |
| 9,2   | 9,1   | 10,5  | 7,7   | 9,8   | 9,6   | 7,6   |
| 3,08  | 4,67  | 4,04  | 3,47  | 4,02  | 4,68  | 5,31  |
| 70    | 96    | 84    | 74    | 89    | 102   | 110   |
| 0,21  | 0,3   | 0,25  | 0,23  | 0,28  | 0,31  | 0,34  |
| 68,3  | 64    | 61,7  | 66    | 68,6  | 64,6  | 64,8  |
| 22,7  | 20,6  | 20,8  | 21,3  | 22,1  | 21,8  | 20,7  |
| 33,3  | 32,1  | 33,7  | 32,3  | 32,3  | 33,2  | 32    |
| 542   | 346   | 316   | 536   | 151   | 223   | 83    |
| 62    | 47    | 33    | 35    | 59    | 35    | 73    |
| 34    | 35    | 29    | 33    | 37    | 40    | 26    |
| 31    | 35    | 30    | 34    | 33    | 34    | 31    |
| 53    | 75    | 34    | 59    | 50    | 65    | 52    |
| 15,6  | 15,9  | <2,0  | 15,8  | <2,0  | <2,0  | <2,0  |
| 5,13  | 5,13  | 5,13  | 6,84  | 6,84  | 6,84  | 5,13  |
| 692   | 649   | 496   | 613   | 505   | 511   | 536   |
| 96,4  | 122   | 105,2 | 120,2 | 118,5 | 146,7 | 107,9 |
| 4,5   | 3,16  | 2,16  | 4     | 2,33  | 4,16  | 3,5   |
| 142   | 144   | 143   | 145   | 141   | 138   | 140   |
| 4     | 3,9   | 3,2   | 3,8   | 3,3   | 3,5   | 4     |
| 2,45  | 2,38  | 2,32  | 2,39  | 2,46  | 2,5   | 2,54  |
| 0,98  | 0,86  | 0,78  | 0,93  | 0,9   | 1,05  | 0,97  |
| 103   | 102   | 101   | 102   | 98    | 100   | 101   |
| 2,23  | 1,94  | 1,87  | 2,15  | 2,3   | 2,09  | 2,09  |
| 21,5  | 10,6  | 12    | 27,4  | 16,8  | 16,3  | 19,3  |
| 4     | 4,22  | 5,44  | 5,44  | 7,16  | 7,38  | 11,1  |
| 31,7  | 25,4  | 23,7  | 27,4  | 32,1  | 30    | 30,8  |
| 64    | 63    | 54    | 63    | 72    | 72    | 69    |



| Day 28 |       |       |       |       |       |       |
|--------|-------|-------|-------|-------|-------|-------|
| 1      | 2     | 3     | 4     | 9     | 11    | 12    |
| Lenva  | Lenva | Lenva | Lenva | DMSO  | DMSO  | DMSO  |
| 5,8    | 7     | 6,3   | 5,8   | 6,7   | 6,3   | 8,4   |
| 5,32   | 6     | 5,71  | 5,32  | 5,03  | 6,13  | 5,1   |
| 116    | 126   | 118   | 116   | 110   | 134   | 112   |
| 0,36   | 0,39  | 0,37  | 0,36  | 0,33  | 0,4   | 0,34  |
| 67,5   | 64,8  | 64,9  | 67,5  | 65,8  | 64,7  | 66,2  |
| 21,8   | 21    | 20,7  | 21,8  | 21,9  | 21,9  | 22    |
| 32,3   | 32,4  | 31,8  | 32,3  | 33,2  | 33,8  | 33,2  |
| 431    | 263   | 256   | 431   | 415   | 298   | 403   |
| 64     | 61    | 61    | 64    | 105   | 67    | 103   |
| 31     | 29    | 33    | 31    | 33    | 28    | 12    |
| 34     | 41    | 33    | 34    | 29    | 42    | 29    |
| 56     | 63    | 48    | 56    | 49    | 43    | 44    |
| < 2,0  | < 2,0 | < 2,0 | < 2,0 | < 2,0 | < 2,0 | < 2,0 |
| 3,42   | 3,42  | 3,42  | 3,42  | 3,42  | 3,42  | 5,13  |
| 120    | 157   | 339   | 120   | 185   | 124   | 56    |
| 91,1   | 122,9 | 108,7 | 91,1  | 97,2  | 112,3 | 103,4 |
| 4,83   | 4     | 3,66  | 4,83  | 3     | 3,83  | 2,33  |
| 143    | 141   | 146   | 143   | 140   | 139   | 139   |
| 3,6    | 3,6   | 3,3   | 3,6   | 3,5   | 4     | 3,3   |
| 2,5    | 2,57  | 2,45  | 2,5   | 2,51  | 2,48  | 2,55  |
| 0,76   | 0,76  | 0,83  | 0,76  | 0,71  | 0,79  | 0,83  |
| 103    | 100   | 103   | 103   | 103   | 104   | 99    |
| 1,9    | 1,67  | 1,84  | 1,9   | 1,91  | 1,87  | 1,79  |
| 42,8   | 18,3  | 22,7  | 42,8  | 25,4  | 21,9  | 9,1   |
| 4,83   | 6,83  | 6,6   | 4,83  | 4,66  | 7,16  | 9,82  |
| 34,7   | 33,4  | 31,7  | 34,7  | 35,9  | 33    | 34,8  |
| 79     | 82    | 73    | 79    | 75    | 76    | 78    |

### Supplement Table IV: Antibody List

| target                                                                       | used in              | antibody | manufacturer   | dilution                     |
|------------------------------------------------------------------------------|----------------------|----------|----------------|------------------------------|
| <b>mouse mouse mouse mouse mouse mouse mouse mouse mouse mouse</b>           |                      |          |                |                              |
| KI67                                                                         | IHC                  | ab16667  | Abcam          | 1:50                         |
| MYH11                                                                        | IHC                  | ab224804 | Abcam          | 1:100                        |
| $\alpha$ smooth muscle actin                                                 | IHC                  | ab119952 | Abcam          | 1:200                        |
| CD31                                                                         | IHC                  | ab28364  | Abcam          | 1:200                        |
| <b>pig and human pig and human pig and human pig and human pig and human</b> |                      |          |                |                              |
| SMA                                                                          | IHC<br>prim IF       | ab7817   | Abcam          | 1:200                        |
| CD31                                                                         | IHC                  | ab28364  | Abcam          | 1:500                        |
| MYH11                                                                        | IHC<br>prim IF<br>WB | ab53219  | Abcam          | 1:300<br>1:200<br>1:500      |
| Alexa Fluor 488                                                              | sec IF<br>human/pig  | A11034   | Invitrogen     | 1:300 (human)<br>1:500 (pig) |
| Alexa Fluor 594                                                              | sec IF<br>pig        | A11032   | Invitrogen     | 1:500                        |
| Alexa Fluor 647                                                              | sec IF<br>human      | A21236   | Invitrogen     | 1:300                        |
| $\beta$ -actin                                                               | WB                   | A1978    | Sigma-Aldrich  | 1:5000                       |
| Phospho-p44/42 MAPK (Erk1/2)                                                 | WB                   | 4370     | Cell Signaling | 1:2000                       |
| p44/42 MAPK (Erk1/2)                                                         | WB                   | 4695     | Cell Signaling | 1:1000                       |
| Phospho-SAPK/JNK                                                             | WB                   | 9255     | Cell Signaling | 1:2000                       |
| Phospho-Akt                                                                  | WB                   | 9271     | Cell Signaling | 1:1000                       |
| Akt                                                                          | WB                   | 9272     | Cell Signaling | 1:1000                       |
| $\beta$ -Tubulin                                                             | WB                   | Ab6046   | Abcam          | 1:500                        |
| Goat Anti-Mouse IgG H&L (HRP)                                                | WB                   | ab205719 | Abcam          | 1:10000                      |
| Goat Anti-Rabbit IgG H&L (HRP)                                               | WB                   | ab205718 | Abcam          | 1:2000                       |
